1 **Discovery of biased orientations of human regulatory motifs affecting**  
2 **transcription of genes and including known insulators**

3

4 Naoki Osato<sup>1\*</sup>

5

6 <sup>1</sup>Department of Bioinformatic Engineering, Graduate School of Information Science  
7 and Technology, Osaka University, Osaka 565-0871, Japan

8 \*Corresponding author

9 E-mail address: [naokiosato11@gmail.com](mailto:naokiosato11@gmail.com), [nosato@ist.osaka-u.ac.jp](mailto:nosato@ist.osaka-u.ac.jp)

10

## 11 **Abstract**

12 Chromatin interactions have important roles for enhancer-promoter interactions  
13 (EPIs) and regulating the transcription of genes. CTCF and cohesin proteins are located  
14 at the anchors of chromatin interactions, forming their loop structures. CTCF has  
15 insulator function limiting the activity of enhancers into the loops. DNA binding  
16 sequences of CTCF indicate their orientation bias at chromatin interaction anchors –  
17 forward-reverse (FR) orientation is frequently observed. Other DNA binding proteins  
18 such as YY1, ZNF143 and SMARCA4 are also reported to be associated with  
19 chromatin interactions. It is still unclear what proteins are associated with chromatin  
20 interactions and insulator function.

21 To find DNA binding motif sequences of transcription factors (TFs) like CTCF,  
22 affecting the interaction between enhancers and promoters of genes and their expression  
23 by the insulator function of the TFs, first, I predicted TF bound in enhancers and  
24 promoters using DNA motif sequences of TFs and experimental data of open chromatin  
25 regions in monocytes, T, Th17, Treg, GM12878 cells, HMEC and NPC, which were  
26 obtained from public and commercial databases. Second, transcriptional target genes of  
27 each TF were predicted based on enhancer-promoter association (EPA). An EPA was  
28 shortened at the FR or reverse-forward (RF) orientation of DNA motif sites of a TF,  
29 which were supposed to be at chromatin interaction anchors and acted as insulator sites.  
30 Then, the expression levels of transcriptional target genes predicted based on the EPA  
31 were compared with those predicted from closed chromatin regions.

32 Total 96 biased orientations of DNA motifs (64 FR and 52 RF orientations, the

33 reverse complement sequences of some DNA motifs were also registered in databases,  
34 so the total number was smaller than the number of FR and RF) affected the expression  
35 level of putative transcriptional target genes significantly in monocytes, T cells, HMEC  
36 and NPC in common, including known TFs associated with chromatin interaction and  
37 insulator function such as CTCF, cohesin (RAD21 and SMC3), YY1 and ZNF143.  
38 Compared with chromatin interaction data, for 44 (69%) FR and 28 (54%) RF  
39 orientations of DNA motif sequences in CD4<sup>+</sup> T cells, EPIs predicted from EPAs that  
40 were shortened at the biased orientations of DNA motif sites, overlapped with  
41 chromatin interactions significantly more than other types of EPAs. Using gene  
42 expression data among 53 tissues, 43 (72%) FR and 40 (80%) RF orientations of DNA  
43 motifs showed significantly reduced correlation in expression level of nearby genes  
44 separated by the motif sites. These analyses suggest that the DNA motifs are associated  
45 with insulator functions.

46

47 **Keywords:** transcriptional target genes, gene expression, transcription factors, enhancer,  
48 enhancer-promoter interactions, chromatin interactions, CTCF, cohesin, open chromatin  
49 regions, co-location of transcription factors, homodimer, heterodimer, complex

50

## 51 **Background**

52 Chromatin interactions have important roles for enhancer-promoter interactions  
53 (EPIs) and regulating the transcription of genes. CTCF and cohesin proteins are located  
54 at the anchors of chromatin interactions, forming their loop structures. CTCF has

55 insulator function limiting the activity of enhancers into the loops (Fig. 1A). The DNA  
56 binding sequence of CTCF indicate its orientation bias at chromatin interaction anchors  
57 – forward-reverse (FR) orientation is frequently observed (Rao et al. 2014; de Wit et al.  
58 2015; Guo et al. 2015). Other DNA binding proteins such as ZNF143, YY1 and  
59 SMARCA4 (BRG1) are found to be associated with chromatin interaction and EPI  
60 (Bailey et al. 2015; Barutcu et al. 2016; Weintraub et al. 2017). CTCF, cohesin, ZNF143,  
61 YY1 and SMARCA4 have other biological functions as well as chromatin interaction  
62 and EPI. The DNA binding motif sequences of these transcription factors (TFs) are  
63 found in open chromatin regions near transcriptional start sites (TSS) as well as  
64 chromatin interaction anchors.

65 DNA binding motif sequence of ZNF143 was enriched at both chromatin  
66 interaction anchors. ZNF143's correlation with the CTCF-cohesin cluster relies on its  
67 weakest binding sites, found primarily at distal regulatory elements defined by the  
68 'CTCF-rich' chromatin state. The strongest ZNF143-binding sites map to promoters  
69 bound by RNA polymerase II (POL2) and other promoter-associated factors, such as the  
70 TATA-binding protein (TBP) and the TBP-associated protein, together forming a  
71 'promoter' cluster (Bailey et al. 2015).

72 DNA binding motif sequence of YY1 does not seem to be enriched at both  
73 chromatin interaction anchors ( $Z$ -score  $< 2$ ), whereas DNA binding motif sequence of  
74 ZNF143 is significantly enriched ( $Z$ -score  $> 7$ ; Bailey et al. 2015 Figure 2a). In the  
75 analysis of YY1, to identify a protein factor that might contribute to EPI, (Ji et al. 2015)  
76 performed chromatin immune precipitation with mass spectrometry (ChIP-MS), using

77 antibodies directed toward histones with modifications characteristic of enhancer and  
78 promoter chromatin (H3K27ac and H3K4me3, respectively). Of 26 transcription factors  
79 that occupy both enhancers and promoters, four are essential based on a CRISPR  
80 cell-essentiality screen and two (CTCF, YY1) are expressed in >90% of tissues  
81 examined (Weintraub et al. 2017). This research started from the analysis of histone  
82 modifications of enhancer and promoter marks rather than chromatin interactions. Other  
83 protein factors associated with chromatin interaction and insulator function may be  
84 found from other researches.

85 As computational approaches, machine-learning analyses to predict chromatin  
86 interactions were proposed (Schreiber et al. 2017; Zhang et al. 2017). However, they  
87 were not intended to find DNA motif sequences of TFs affecting chromatin interaction,  
88 EPI and the expression level of transcriptional target genes, which were examined in  
89 this study.

90 DNA binding proteins involved in chromatin interactions are supposed to affect  
91 the transcription of genes in the loops formed by chromatin interactions. To analyze this  
92 property, I found that the expression level of human putative transcriptional target genes  
93 of a TF was significantly changed, according to the criteria of enhancer-promoter  
94 association (EPA) (Osato 2018). An EPA was shortened at the FR orientation of CTCF  
95 binding sites, and transcriptional target genes of each TF bound in enhancers and  
96 promoters were predicted based on the EPA (Fig. 1B). The expression levels of  
97 transcriptional target genes were significantly changed, compared with the expression  
98 levels of transcriptional target genes predicted from promoters (or closed chromatin

99 regions). The expression levels tend to be increased in monocytes and CD4<sup>+</sup> T cells,  
100 implying that enhancers activate the transcription of genes. The expression levels tend  
101 to be decreased in ES and iPS cells, implying that enhancers repress the transcription of  
102 genes. These analyses showed that the expression level of putative transcriptional target  
103 genes of a TF bound in enhancers was changed significantly, as EPIs were predicted  
104 properly using insulator sites of CTCF. This suggests that the difference of the  
105 expression level would be an index of the accuracy of the prediction of transcriptional  
106 target genes of a TF based on an EPA. Other DNA binding proteins involved in  
107 chromatin interactions as well as CTCF may locate at chromatin interaction anchors  
108 with a pair of biased orientation of DNA binding motif sites, affecting the expression  
109 level of putative transcriptional target genes through their insulator function.

110 As experimental issues of analyses of chromatin interactions, chromatin  
111 interaction data are changed, according to experimental techniques, the number of reads  
112 of DNA sequencing and even replication sets of the same cell type. Chromatin  
113 interaction data may not be saturated enough to contain all chromatin interactions and  
114 may include experimental noise such as ligation error. Supposing the properties of DNA  
115 binding proteins associated with chromatin interactions and avoiding experimental  
116 issues of analyses of chromatin interactions, here I searched for DNA motif sequences  
117 of TFs, affecting EPI and the expression level of putative transcriptional target genes in  
118 monocytes, T cells, HMEC and NPC without using chromatin interaction data. Then,  
119 putative EPIs were compared with chromatin interaction and gene expression data.

120

## 121 **Results**

### 122 **Search for biased orientations of DNA motif sequences**

123 Transcription factor binding sites (TFBSs) were predicted using open chromatin  
124 regions and DNA motif sequences of transcription factors (TF) collected from various  
125 databases and journal papers (see Methods). Transcriptional target genes were predicted  
126 using TFBS in promoters and enhancers. An enhancer-promoter association (EPA) was  
127 shortened at the DNA binding motif sites of a TF acting as insulator such as CTCF and  
128 cohesin (RAD21 and SMC3) (Fig. 1B). To find DNA motif sequences of TF acting as  
129 insulator, other than CTCF and cohesin, affecting the expression level of genes, An EPA  
130 was shortened at the DNA motif sites of a putative insulator TF, and transcriptional  
131 target genes of each general TF bound in (i) distal open chromatin regions (enhancers)  
132 and (ii) closed chromatin regions in promoters were predicted based on the EPA, in  
133 order to estimate enhancer activity of each TF. The ratio of expression level of putative  
134 transcriptional target genes of each TF between (i) and (ii) was calculated. The  
135 distribution of the ratios of all TF was compared among forward-reverse (FR),  
136 reverse-forward (RF) and any orientation (i.e. without considering orientation) of DNA  
137 motif sites of an insulator TF shortening EPA using Mann-Whitney test, two-sided  
138 ( $p$ -value  $< 10^{-7}$ ), and the number of putative insulator TFs with significant difference of  
139 the distributions of expression level among FR, RF and Any was counted (Fig. 2A). To  
140 check the prediction of DNA motif sites of TFs, the distribution of DNA motif sites  
141 were examined in the human genome. DNA motif sites of TFs associated with  
142 chromatin interactions were found near TSS (Fig. 2B). ZNF143 is known to bind to

143 promoter of genes establishing looping with distal element bound by CTCF (Fig. 5)  
144 (Bailey et al. 2015). YY1 is multi-functional transcriptional regulator and is involved in  
145 transcriptional activation, repression and initiation (Shrivastava and Calame 1994; Xi et  
146 al. 2007). Most of DNA sites of the TFs were found in intergenic and intron regions of  
147 the human genome (Fig. 2C). Several hundreds of FR and RF orientations of DNA  
148 motifs of TFs were found in monocytes, T cells, human mammary epithelial cells  
149 (HMEC) and neural progenitor cells (NPC) (Fig. 3). The number of the TFs seemed to  
150 be changed, according to the number of DNase-seq reads, since the number of the reads  
151 in monocyte is larger than the other three cell types. When DNase-seq reads increase,  
152 more DNA motif sites may be predicted to some extent. Total 96 of biased (64 FR and  
153 52 RF) orientations of DNA binding motif sequences of TFs were found in the four cell  
154 types in common, whereas any orientation of DNA binding motif sequence was not  
155 found (Fig. 3; Table 1; Supplemental material). The FR orientation of DNA motif  
156 sequences included CTCF, cohesin (RAD21 and SMC3), YY1 and ZNF143, which are  
157 associated with chromatin interaction and EPI.

158 Without considering the difference of orientations of DNA binding motif  
159 sequences among cell types, 175 of biased orientations of DNA binding motif  
160 sequences of TFs were found in the four cell types in common. These numbers (96 and  
161 175) are unique number of TFs with biased orientation of DNA motifs, and not the  
162 number of DNA motifs. As one of reasons for the increase of the number 175 from 96, a  
163 TF or an isoform of the same TF may bind to a different DNA binding motif sequence,  
164 according to cell types and/or in the same cell type. About 50% or more of alternative



165 splicing isoforms are differently expressed among tissues, indicating that most  
166 alternative splicing is subject to tissue-specific regulation (Das et al. 2007; Wang et al.  
167 2008; Chen and Manley 2009). As another reason, the same TF has several DNA  
168 binding motif sequences and in some cases one of the motif sequences is almost the  
169 same as the reverse complement sequence of another motif sequence of the same TF.  
170 Moreover, I previously found that a complex of TF would bind to a slightly different  
171 DNA binding motif sequence from the combination of DNA binding motif sequences of  
172 TFs composing the complex in *C. elegans* (Tabuchi et al. 2011). The difference of  
173 binding specificity of pairs of transcription factors was reported (Jolma et al. 2015).  
174 Cofactors also contribute to alter binding specificity of transcription factors (Ansari and  
175 Peterson-Kaufman 2011; Slattery et al. 2011; Merabet and Mann 2016). These increase  
176 the variety and number of (biased orientations of) DNA binding motif sequences of a TF,  
177 which are potentially involved in different biological functions among cell types.

178

### 179 **Comparison with chromatin interaction data**

180 To examine whether the biased orientations of DNA motif sequences are  
181 associated with chromatin interaction, enhancer-promoter interactions (EPIs) predicted  
182 based on an enhancer-promoter association (EPA) were compared with chromatin  
183 interaction data. HiChIP chromatin interaction data were used for CD4<sup>+</sup> T cells  
184 (Mumbach et al. 2017). EPIs predicted based on an EPA were compared with three  
185 replications (B2T1, B2T2 and B3T1) of HiChIP chromatin interaction data respectively.  
186 The resolutions of HiChIP chromatin interaction data and EPIs were adjusted to 5

187 kilobases (kb). EPI were predicted based on three types of EPAs: (i) EPA shortened at  
188 the FR or RF orientation of DNA motif sites of a TF acting as insulator such as CTCF,  
189 (ii) EPA shortened at the DNA motif sites of a TF without considering their orientation,  
190 and (iii) EPA without being shortened by DNA motif sites. Total 201 biased orientations  
191 [133 (49%) FR and 90 (43%) RF of 273 FR and 211 RF] of DNA motif sequences in T  
192 cells, which included CTCF, cohesin (RAD21 and SMC3), ZNF143 and YY1 in three  
193 replications (B2T1, B2T2, and B3T1), showed a significantly higher ratio of EPIs  
194 overlapped with HiChIP chromatin interactions with  $\geq 1,000$  counts for each interaction  
195 in EPA (i) than the other types of EPA (ii) and (iii) in T cells (Table 2). When comparing  
196 EPIs predicted based on only EPA (i) and (iii) with the chromatin interactions, total 390  
197 biased orientations [261 (96%) FR and 199 (94%) RF of 273 FR and 211 RF] of DNA  
198 motif sequences in T cells showed a significantly higher ratio of EPIs overlapped with  
199 the chromatin interactions in EPA (i) than EPA (iii) (Table 2; Supplemental material).  
200 The difference between EPIs predicted based on EPA (i) and (ii) seemed to be difficult  
201 to distinguish using the chromatin interaction data and statistical test in some cases.  
202 However, as for the difference between EPIs predicted based on EPA (i) and (iii), a  
203 larger number of biased orientations of DNA motif sequences were found to be  
204 correlated with chromatin interaction data. Chromatin interaction data were obtained  
205 from different samples from DNase-seq open chromatin regions, so individual  
206 differences may exist. (Mumbach et al. 2017) suggested that individual differences of  
207 chromatin interactions were larger than those of open chromatin regions. Most of biased  
208 orientations of DNA motif sequences (95%) were found to be correlated with chromatin

209 interactions, when comparing EPIs predicted based on EPA (i) and (iii) with HiChIP  
210 chromatin interactions.

211 Additionally, to confirm these tendencies of comparison of EPIs with HiChIP  
212 chromatin interactions, the same analysis was conducted using HiChIP chromatin  
213 interaction data in Th17, Treg and GM12878 cells. Total 128 biased orientations [76  
214 (38%) FR and 64 (35%) RF of 200 FR and 183 RF] of DNA motif sequences in Th17  
215 cells, which included CTCF, cohesin (RAD21 and SMC3), ZNF143 and YY1 in three  
216 replications (B1T2, B2T1, and B3T1), showed a significantly higher ratio of EPIs  
217 overlapped with HiChIP chromatin interactions in EPA (i) than the other types of EPA  
218 (ii) and (iii) (Supplemental material). When comparing EPIs predicted based on only  
219 EPA (i) and (iii) with the chromatin interactions, total 282 biased orientations [182  
220 (91%) FR and 162 (89%) RF of 200 FR and 183 RF] of DNA motif sequences showed a  
221 significantly higher ratio of EPIs overlapped with the chromatin interactions in EPA (i)  
222 than EPA (iii) (Supplemental material).

223 For Treg cells, chromatin interactions in one biological replication were  
224 overlapped with EPIs, but those in the other two biological replications were less  
225 overlapped with EPIs, so the one replication (B3T1) was used for this analysis. Total  
226 281 biased orientations [154 (53%) FR and 176 (54%) RF of 290 FR and 323 RF] of  
227 DNA motif sequences, which included CTCF, cohesin (RAD21 and SMC3), ZNF143  
228 and YY1, showed a significantly higher ratio of EPIs overlapped with HiChIP  
229 chromatin interactions in EPA (i) than the other types of EPA (ii) and (iii) (Supplemental  
230 material). When comparing EPIs predicted based on only EPA (i) and (iii) with the

231 chromatin interactions, total 482 biased orientations [283 (98%) FR and 309 (96%) RF  
232 of 290 FR and 323 RF] of DNA motif sequences showed a significantly higher ratio of  
233 EPIs overlapped with the chromatin interactions in EPA (i) than EPA (iii) (Supplemental  
234 material).

235 For GM12878 cells, total 168 biased orientations [96 (38%) FR and 98 (35%) RF  
236 of 229 FR and 237 RF] of DNA motif sequences, which included CTCF, cohesin  
237 (RAD21 and SMC3), ZNF143 and YY1 in two replications (B1 and B2), showed a  
238 significantly higher ratio of EPIs overlapped with HiChIP chromatin interactions in EPA  
239 (i) than the other types of EPA (ii) and (iii) (Supplemental material). When comparing  
240 EPIs predicted based on only EPA (i) and (iii) with the chromatin interactions, total 366  
241 biased orientations [218 (95%) FR and 227 (96%) RF of 229 FR and 237 RF] of DNA  
242 motif sequences showed a significantly higher ratio of EPIs overlapped with the  
243 chromatin interactions in EPA (i) than EPA (iii) (Supplemental material).

244 In situ Hi-C data was available from 4D nucleome data portal in HMEC, and was  
245 compared with putative EPIs. Total 222 biased orientations [155 (50%) FR and 108  
246 (40%) RF of 310 FR and 269 RF] of DNA motif sequences, which included CTCF,  
247 cohesin (RAD21 and SMC3), ZNF143 and YY1, showed a significantly higher ratio of  
248 EPIs overlapped with in situ Hi-C chromatin interactions ( $\geq 1$  count for each interaction,  
249 i.e. all interactions) in EPA (i) than the other types of EPA (ii) and (iii) (Supplemental  
250 material). When comparing EPIs predicted based on only EPA (i) and (iii) with the  
251 chromatin interactions, total 406 biased orientations [268 (86%) FR and 230 (86%) RF  
252 of 310 FR and 269 RF] of DNA motif sequences showed a significantly higher ratio of

253 EPIs overlapped with the chromatin interactions in EPA (i) than EPA (iii) (Supplemental  
254 material). There were six replications of in situ Hi-C experimental data of HMEC, but  
255 other replications contained much smaller number of chromatin interactions. The  
256 HiChIP chromatin interaction data in T cells were expected to be enriched with  
257 enhancer-promoter interactions, since it used H3K27ac antibody to collect chromatin  
258 interactions. In situ Hi-C data contain all types of chromatin interactions and thus,  
259 contain a smaller number of enhancer-promoter interactions, relative to HiChIP data.  
260 Chromatin interactions with a small number of counts may be artifacts derived from  
261 ligation errors during experiments (Lieberman-Aiden et al. 2009; Yardimci et al. 2019).  
262 Therefore, other replications of in situ Hi-C data with a smaller number of chromatin  
263 interactions will not be available for this analysis.

264 Promoter capture Hi-C data of NPC was downloaded and analyzed in the same  
265 way as T cell and HMEC (Jung et al. 2019). Total 109 biased orientations [61 (28%) FR  
266 and 60 (25%) RF of 205 FR and 241 RF] of DNA motif sequences, which included  
267 CTCF, cohesin (RAD21 and SMC3), ZNF143 and YY1, showed a significantly higher  
268 ratio of EPIs overlapped with promoter capture Hi-C chromatin interactions ( $\geq 1$  count  
269 for each interaction, i.e. all interactions) in EPA (i) than the other types of EPA (ii) and  
270 (iii) (Supplemental material). When comparing EPIs predicted based on only EPA (i)  
271 and (iii) with the chromatin interactions, total 186 biased orientations [99 (48%) FR and  
272 103 (43%) RF of 205 FR and 241 RF] of DNA motif sequences showed a significantly  
273 higher ratio of EPIs overlapped with the chromatin interactions in EPA (i) than EPA (iii)  
274 (Supplemental material).

275 All three types of chromatin interaction data (HiChIP, in situ Hi-C and promoter  
276 capture Hi-C) indicated that EPIs predicted based on EPA (i) that were shortened at  
277 DNA motif sites of known TFs associated with chromatin interactions (CTCF, RAD21,  
278 SMC3, ZNF143 and YY1), overlapped with more chromatin interactions than the other  
279 EPA (ii) and (iii) in six cell types (T cells, Th17, Treg, GM12878, HMEC and NPC).  
280 For monocyte, Hi-C data was available, but it was not analyzed, due to the low  
281 resolution of chromatin interaction data (50 kb).

282 There may be a possibility that the biased orientations of DNA motif sites of  
283 known TFs associated with chromatin interactions such as CTCF, RAD21, SMC3, YY1  
284 and ZNF143 are located with the biased orientations of DNA motif sites of other TFs,  
285 and thus, they showed a significantly higher ratio of EPIs overlapped with chromatin  
286 interactions in EPA (i) than the other types of EPA (ii) and (iii). However, among 273  
287 FR and 211 RF orientations of DNA motifs of TFs not including known TFs such as  
288 CTCF, RAD21, SMC3, YY1 and ZNF143 in T cells, the DNA motif sites of only 15  
289 (6%) FR and 9 (4%) RF orientations of DNA motifs of TFs overlapped with  $\geq 60\%$  of  
290 DNA motif sites of biased orientations of DNA motifs of either of the known TFs at 5  
291 kb resolution.

292 Moreover, to examine the enhancer activity of EPIs, the distribution of expression  
293 level of putative target genes of EPIs was compared between EPIs overlapped with  
294 HiChIP chromatin interactions and EPIs not overlapped with them. Though the target  
295 genes of EPIs were selected from top 4,000 transcripts (genes) in terms of the  
296 expression level of all transcripts (genes) excluding transcripts not expressed in T, Th17,

297 Treg and GM12878 cells respectively, target genes of EPIs overlapped with chromatin  
298 interactions showed a significantly higher expression level than EPIs not overlapped  
299 with them, suggesting that EPIs overlapped with chromatin interactions activated the  
300 expression of target genes in the four cell types. Almost all (99% - 100%) FR and RF  
301 orientations of DNA motifs showed a significantly higher expression level of putative  
302 target genes of EPIs overlapped with chromatin interactions than EPIs not overlapped in  
303 the four cell types. When a biased orientation of DNA motif showed a significantly  
304 higher expression level of putative target genes of EPIs overlapped with chromatin  
305 interactions than EPIs not overlapped, ‘1’ was marked with in the tables of comparison  
306 between EPIs and HiChIP chromatin interactions in Supplemental material. DNA motifs  
307 showing a significantly lower expression level or not showing a significant difference of  
308 expression level were not observed in this analysis. HiChIP data were produced using  
309 H3K27ac antibody, so chromatin interactions acting as repressor would not be identified.  
310 However, for in situ Hi-C and promoter capture Hi-C data in HMEC and NPC, the  
311 significant difference of expression level of putative target genes of EPIs was observed  
312 in a small percentage (less than 1%) of biased orientations of DNA motifs.

313

#### 314 **Correlation of expression level of gene pairs separated by DNA motif sites of a TF**

315 To examine the effect of biased orientations of DNA motif sequences on gene  
316 expression, I compared the expression level of protein-coding genes the most closely  
317 located to upstream and downstream of biased orientations of DNA motif sites in the  
318 human genome. Closely located genes including divergent gene pairs are expected to

319 show correlation of gene expression among tissues (Purmann et al. 2007; Xie et al.  
320 2007). When a biased orientation of DNA motif sites act as insulator (e.g. CTCF), the  
321 correlation of gene expression level would be reduced. Among 96 biased (64 FR and 52  
322 RF) orientations of DNA motifs of TFs found in common in monocytes, T cells, HMEC  
323 and NPC, TFs with  $\geq 50$  genomic locations of the DNA motif sites were selected, after  
324 the elimination of ubiquitously expressed genes among 53 tissues and DNA motif sites  
325 near the genes with coefficient of variance  $< 90$  (see Methods). After this filtering, 43  
326 (72%) FR and 40 (80%) RF of 60 FR and 50 RF showed a distribution of significantly  
327 lower correlation of gene expression of the closest genes of the DNA motif sites of a TF  
328 than the correlation of all pairs of neighbor genes with intergene distance  $< 1$  megabases  
329 (Mb) (Mann-Whitney test,  $p$ -value  $< 0.05$ ) (Table 3). The FR and RF orientations of  
330 TFs included known TFs associated with chromatin interactions such as CTCF, RAD21,  
331 SMC3, YY1 and ZNF143. Top 20 of the FR and RF orientations of DNA motifs were  
332 selected in ascending order of the median correlation coefficient of expression level of  
333 the closest gene pairs of the DNA motif sites of a TF. The 20 TFs included known TFs  
334 associated with chromatin interactions such as CTCF, RAD21 and SMC3 (Fig. 4)  
335 (Mann-Whitney test,  $p$ -value  $< 0.01$ ). Instead of using all DNA motif sites of a TF,  
336 when DNA motif sites of a TF were limited to sites examined for biased orientations of  
337 DNA motifs in EPAs, 33 (60%) FR and 36 (77%) RF of 55 FR and 47 RF showed a  
338 distribution of significantly lower correlation of expression level of gene pairs separated  
339 by the sites (Supplemental material). With intergene distance  $< 20$  kb and TFs with  $\geq 50$   
340 genomic locations of the DNA motif sites, 21 (34%) FR and 8 (15%) RF of 62 FR and



341 52 RF showed a distribution of significantly lower correlation of gene expression of the  
342 closest genes of the DNA motif sites of a TF than the correlation of all pairs of neighbor  
343 genes (Supplemental material).

344 Some DNA motif sites of biased orientations of DNA motifs of a TF were found  
345 from genomic regions not including known DNA motif sites of TFs associated with  
346 chromatin interactions such as CTCF, RAD21, SMC3, YY1 and ZNF143, and were  
347 located in genomic regions with significantly lower correlation of expression level of  
348 gene pairs. A large number of DNA motif sites of a TF tend to show significantly lower  
349 correlation of gene expression (Median numbers of DNA motif sites showing  
350 significantly lower correlation were 656 and 479 for FR and RF respectively, and  
351 median numbers of DNA motif sites not showing lower correlation were 122 and 115  
352 for FR and RF respectively. Mann-Whitney test  $p$ -value = 0 and  $< 10^{-10}$  for FR and RF  
353 respectively). The DNA motif sites of many TFs showed a significantly lower  
354 correlation of gene expression, so there may be a possibility that when we take a small  
355 number of gene pairs randomly (about hundreds as the same as the number of DNA  
356 motif sites of a TF), the correlation of gene pairs might be significantly low occasionally.  
357 However, the possibility that happen was lower than the expectation from  $p$ -value  
358 threshold by computer simulation.

359

### 360 **Co-location of biased orientations of DNA motif sites of TFs**

361 To examine the association of biased orientations of DNA binding motif  
362 sequences of TFs, co-location of the DNA binding motif sequences within 200bp to

363 each other, which is close to the length of core DNA around octamer of core histone  
364 (146bp), that is, the length of the minimum open chromatin region, was analyzed in  
365 monocytes, T cells, HMEC, and NPC. The same pairs of DNA binding motif sequences  
366 in upstream and downstream of genes in EPAs were enumerated, and the pairs of DNA  
367 binding motif sequences found in  $\geq 100$  genomic regions were listed (Table 4;  
368 Supplemental material). Majority of pairs of DNA motif sites overlapped with more  
369 than 1 base, but the same tendency was found in the analysis of DNA motif sites of all  
370 TFs (Supplemental material). As already known, CTCF was found with cohesin RAD21  
371 and SMC3 (Table 4). Top 30 pairs of FR and RF orientations of DNA motifs overlapped  
372 or co-localized were shown (Table 4). Total numbers of unique pairs of DNA motif sites  
373 of TFs overlapped or co-localized were 404 (FR) and 662 (RF) in monocytes, consisting  
374 of 177 (39% of all FR) and 218 (43% of all RF) unique DNA motifs. Only ten  
375 overlapping or co-location of DNA motifs of TFs were found in the four cell types in  
376 common, including pairs of CTCF, RAD21, SMC3 and YY1. This implied that most of  
377 overlapping and co-location of DNA motifs of TFs act in cell-type-specific manner  
378 (Supplemental material). Pairs of biased orientations of DNA binding motifs of TFs  
379 tend to overlap, and relatively a small number of motifs are co-localized in upstream  
380 and downstream of genes. Overlapping DNA motifs act as DNA binding sites of several  
381 TFs simultaneously or competitively (Ackerman et al. 1991; Yoon and Chikaraishi  
382 1992; Ansari and Peterson-Kaufman 2011; Slattery et al. 2011; Chatterjee et al. 2012;  
383 He et al. 2015; Kin et al. 2016; Merabet and Mann 2016). CTCF and cohesin have also  
384 been reported to act coordinately with another TF and a protein such as Klf4 and Brd2

385 (Wei et al. 2013; Hsu et al. 2017). Klf4 recruits cohesin to the Oct4 enhancer region.  
386 BRD2 supports boundary (insulator) activity of CTCF. The analysis of 457 ChIP-seq  
387 data sets on 119 human TFs showed that secondary motifs were detected in addition to  
388 the canonical motifs of the TFs, indicating tethered binding and co-binding between  
389 multiple TFs (Wang et al. 2012a). The authors observed significant position and  
390 orientation preferences between many co-binding TFs. Overlapping DNA motif sites of  
391 TFs found in this study may not be artifact, but biologically functional. Though repeat  
392 sequences in human genome were masked, more than a hundred of pairs of DNA motif  
393 sites overlapped at hundreds or thousands upstream and downstream regions of genes.

394

## 395 **Discussion**

396 To find DNA motif sequences of transcription factors (TFs) affecting the  
397 expression level of human putative transcriptional target genes, DNA motif sequences  
398 were searched from open chromatin regions of monocytes, T cells, HMEC and NPC.  
399 Total 96 biased [64 forward-reverse (FR) and 52 reverse-forward (RF)] orientations of  
400 DNA motif sequences of TFs were found in the four cell types in common, whereas any  
401 orientation (i.e. without considering orientation) of DNA motif sequence of a TF was  
402 not found to affect the expression level of putative transcriptional target genes,  
403 suggesting that an enhancer-promoter association (EPA) shortened at the FR or RF  
404 orientation of DNA motif sites of a TF includes more accurate prediction of  
405 enhancer-promoter interactions (EPIs), which were supported by the comparisons with  
406 chromatin interaction and gene expression data..

407 In general, DNA motif sequences of TFs were searched from genome sequences  
408 using position weight matrix or position frequency matrix and allowing mismatches of  
409 DNA sequences under a certain threshold. However, the change of the threshold  
410 affected the result of analyses, and it seems to be difficult to find the best parameter  
411 setting to reduce false-positive and false-negative predictions of DNA binding sites of  
412 TFs. Therefore, firstly, to obtain a robust result in this study, position weight matrices of  
413 DNA motifs were converted into consensus DNA sequences including degenerated sites,  
414 which consist of alphabet of 15 characters (See Methods). This does not need parameter  
415 setting in the search for DNA motif sequences, and is the same as *k*-mer analysis of  
416 DNA motif sequences of TFs. Though the number of genomic regions matched with a  
417 DNA motif sequence was decreased, about 200 FR and RF orientations of DNA motif  
418 sequences of TFs were found, and the number of any orientation of DNA motif  
419 sequences of TFs was quite small, suggesting that false-positive prediction of DNA  
420 binding sites of TFs was reduced. However, the length of the consensus DNA sequences  
421 of some TFs is relatively long. When the core DNA binding sequence of a TF is short (5  
422 or 6 bp), it may be strict to find perfect matches of long consensus DNA sequences in  
423 genome sequences, not allowing a mismatch of the DNA sequence (Methods in (Xie et  
424 al. 2007)).

425 Secondly, protein interaction quantitation (PIQ) tool was used to find DNA motif  
426 sites of TFs (Sherwood et al. 2014). PIQ predicts DNA motif sites of TFs by reducing  
427 noises of DNase-seq data, and the comparison of the prediction with ChIP-seq data  
428 revealed that PIQ has a better performance than other tools and digital genome

429 footprinting (DNase-DGF). The prediction of DNA motif sites of TFs using PIQ in this  
430 study showed an increase of biased orientations of DNA motif sequences of TFs,  
431 reducing the number of any orientation of DNA motif sequences of TFs. The number of  
432 DNA motif sites of TFs was expected to increase, relative to the above method to use  
433 consensus DNA sequences of TFs in the preceding section. However, the number of  
434 DNA motif sites was almost the same or slightly decreased, compared with the result of  
435 consensus DNA sequences, suggesting that PIQ increases true positive predictions of  
436 DNA motif sites, reducing false positive predictions.

437 To estimate the enhancer activity of DNA motifs of TFs, the expression level of  
438 putative transcriptional target genes of a TF was compared between DNA motif sites of  
439 TFs in distal open chromatin regions (enhancers) and closed chromatin regions in  
440 promoters. Previously, the expression level was compared between distal open  
441 chromatin regions and open chromatin regions in promoters. However, it would be easy  
442 to understand the comparison of DNA motif sites of a TF between distal open chromatin  
443 regions and closed chromatin regions to estimate the enhancer activity of TFs. The  
444 number of DNA motif sites in closed chromatin regions was large, so the number in  
445 closed chromatin regions in promoter was used.

446 When forming a homodimer or heterodimer with another TF, TFs may bind to  
447 genome DNA with a specific orientation of their DNA binding sequences (Fig. 5). From  
448 the analysis of biased orientations of DNA motif sequences of TFs, TFs forming  
449 heterodimer would also be found. If the DNA binding motif sequence of only the mate  
450 to a pair of TFs was found in an EPA, the EPA was shortened at one side, which is the

451 DNA binding motif site of the mate to the pair, and transcriptional target genes were  
452 predicted using the EPA shortened at the side. In this analysis, the mate to both  
453 heterodimer and homodimer of TFs can be used to examine the effect on the expression  
454 level of transcriptional target genes predicted based on the EPA shortened at one side.  
455 Biased orientations of DNA motif sequences may also be found in forward-forward or  
456 reverse-reverse orientation.

457 At first, EPIs were compared with chromatin interactions (Hi-C) in monocytes.  
458 Using open chromatin regions overlapped with peaks of ChIP-seq experiment of histone  
459 modification marks of an enhancer (H3K27ac), the ratio of EPIs not overlapped with  
460 chromatin interactions was reduced. (Phanstiel et al. 2017) also reported that there was  
461 an especially strong enrichment for loops with H3K27 acetylation peaks at both ends  
462 (Fisher's Exact Test,  $p = 1.4 \times 10^{-27}$ ). However, the total number of EPIs overlapped  
463 with chromatin interactions was also reduced using H3K27ac peaks, so more chromatin  
464 interaction data would be needed to obtain reliable results in this analysis. As an issue of  
465 experimental data, data for chromatin interactions and open chromatin regions were  
466 obtained from different samples and donors, so individual differences would exist. The  
467 resolution of chromatin interaction data used in monocytes was about 50 kb, thus the  
468 number of unique chromatin interactions was relatively small (72,284 at 50 kb  
469 resolution with a cutoff score of CHiCAGO tool > 1 and 16,501 with a cutoff score of  
470 CHiCAGO tool > 5) ('PCHiC\_peak\_matrix\_cutoff0.txt.gz' file was downloaded from  
471 'Promoter Capture Hi-C in 17 human primary blood cell types' website  
472 <https://osf.io/u8tzp/files/>). To examine the difference of the numbers of EPIs overlapped

473 with chromatin interactions, according to the three types of EPAs, the unique and total  
474 number of chromatin interactions should be large enough.

475 As HiChIP chromatin interaction data were available in CD4<sup>+</sup> T, Th17, Treg and  
476 GM12878 cells, biased orientations of DNA motif sequences of TFs were examined in  
477 the four cell types. The resolutions of chromatin interactions and EPIs were adjusted to  
478 5 kb by fragmentation of genome sequences. The number of unique HiChIP cis (i.e. in  
479 the same chromatin) chromatin interactions was 19,926,360 at 5 kb resolution in B2T1  
480 replication of T cells, 666,149 at 5 kb resolution with chromatin interactions ( $\geq 1,000$   
481 counts for each interaction) and 78,209 at 5 kb resolution with chromatin interactions  
482 ( $\geq 6,000$  counts for each interaction) (Supplemental material). As expected, the number  
483 of EPIs overlapped with chromatin interactions was increased, and 133 FR and 90 RF  
484 orientations of DNA motif sequences of TFs showed a statistical significance in EPIs  
485 predicted based on an EPA shortened at the DNA motif sites of TFs, compared with the  
486 other types of EPA or EPA not shortened. The numbers of unique HiChIP cis chromatin  
487 interactions in other cell types (Th17, Treg and GM12878) were shown in Supplemental  
488 material. The numbers of unique cis chromatin interactions at 5 kb resolution were  
489 different among replications in Th17 cells, so the numbers of interactions were adjusted  
490 between the numbers with  $\geq 1,000$  and  $\geq 6,000$  counts for each interaction in T cells.  
491 For Treg, chromatin interactions in one biological replication overlapped with EPIs, but  
492 those in the other two biological replications were less overlapped with EPIs, so the one  
493 replication was used for this analysis. HiChIP analysis used H3K27ac antibody to  
494 capture chromatin interactions and identified twenty millions of chromatin interactions,

495 but the number of peaks of ChIP-seq experimental data of H3K27ac is usually less than  
496 a hundred thousand. There seems to be much difference of the number of H3K27ac sites  
497 between HiChIP and ChIP-seq, so ChIP-seq peaks of H3K27ac may not cover all  
498 H3K27ac sites. For HMEC, in situ Hi-C chromatin interaction data were available, the  
499 number of unique in situ Hi-C cis chromatin interactions was 121,873,642 at 3 kb  
500 resolution. All chromatin interaction data were used for this analysis to compare EPIs  
501 with chromatin interactions. For NPC, the number of unique promoter capture Hi-C cis  
502 chromatin interactions was 9,436,689 at 5 kb resolution. All chromatin interaction data  
503 were utilized for analysis.

504 It has been reported that CTCF and cohesin-binding sites are frequently mutated  
505 in cancer (Katainen et al. 2015). Some biased orientations of DNA motif sequences  
506 would be associated with chromatin interactions and might be associated with diseases  
507 including cancer.

508 The analyses in this study revealed properties of DNA binding motif sequences of  
509 TFs involved in chromatin interaction, insulator function and potentially forming a  
510 homodimer, heterodimer or complex with other TFs, affecting the transcriptional  
511 regulation of genes.

512

## 513 **Methods**

### 514 **Search for biased orientations of DNA motif sequences**

515 To identify transcription factor binding sites (TFBSs) from open and closed  
516 chromatin regions, TRANSFAC (2019.2), JASPAR (2018), UniPROBE (2018),



517 high-throughput SELEX, transcription factor binding sequences of ENCODE ChIP-seq  
518 data, and HOCOMOCO version 9 and 11 were used to predict insulator sites  
519 (Wingender et al. 1996; Newburger and Bulyk 2009; Portales-Casamar et al. 2010; Xie  
520 et al. 2010; Zhao and Stormo 2011; Jolma et al. 2013; Kheradpour and Kellis 2014;  
521 Kulakovskiy et al. 2018). TRANSFAC (2019.2) was used to analyze enhancer-promoter  
522 interactions, because these data were sufficient to identify biased orientations of DNA  
523 motif sequences of insulator TFs with less computational time, reducing the number of  
524 any orientation of DNA motif sequences of TFs. To reduce false positive prediction of  
525 DNA motif sites of TFs in open chromatin regions, protein interaction quantitation  
526 (PIQ) tool was used with 12,249 position frequency matrices converted from DNA  
527 motifs of vertebrate TFs in the above databases and DNase-seq data from GEO and  
528 Encode database (GSM1024791 CD14<sup>+</sup> monocytes; GSM665812 CD4<sup>+</sup> T cell;  
529 GSM736634 Human mammary epithelial cell, HMEC; GSM878615 Neural progenitor  
530 cell, NPC; ENCF263GMV, ENCF886XEV Th17; GSM1024741 Treg; GSM736620  
531 GM12878) (Sherwood et al. 2014). To find open chromatin regions associated with  
532 enhancer (and promoter) activity, ChIP-seq experimental data of H3K27ac was  
533 downloaded (GSM773004). Narrow peaks of ChIP-seq data were predicted using macs2  
534 callpeak (Zhang et al. 2008). To predict DNA motif sites of TFs from closed chromatin  
535 regions, another method was used. Position weight matrices of vertebrate transcription  
536 factor binding sequences were converted into DNA consensus sequences, which  
537 consist of alphabet of 15 characters (the four bases A, C, G, T, the six two-fold  
538 degenerate IUPAC codes R=[AG], Y=[CT], K=[GT], M=[AC], S=[GC], W=[AT], the

539 four three-fold degenerate IUPAC codes B=[CGT], D=[AGT], H=[ACT], V=[ACG],  
540 and the four-fold degenerate character N=[ATGC]) using convert matrix in RSAT  
541 website (van Helden 2003). Transcription factor binding sequences of vertebrate TFs  
542 were used for further analyses. Transcription factor binding sequences were searched  
543 from narrow peaks of DNase-seq data in repeat-masked hg19 genome sequences using  
544 Match tool in TRANSFAC with similarity score cutoff of 1 after transforming the DNA  
545 consensus sequences of TFs into position frequency matrixes for Match search (Kel et  
546 al. 2003). Repeat-masked hg19 genome sequences were downloaded from UCSC  
547 genome browser (<http://genome.ucsc.edu/>,  
548 <http://hgdownload.soe.ucsc.edu/goldenPath/hg19/bigZips/hg19.fa.masked.gz>). TFs  
549 corresponding to transcription factor binding sequences were searched computationally  
550 and manually by comparing their names and gene symbols of HGNC (HUGO Gene  
551 Nomenclature Committee) -approved gene nomenclature and 31,848 UCSC known  
552 canonical transcripts  
553 (<http://hgdownload.soe.ucsc.edu/goldenPath/hg19/database/knownCanonical.txt.gz>), as  
554 transcription factor binding sequences were not linked to transcript IDs such as UCSC,  
555 RefSeq and Ensembl transcripts.

556 Target genes of a TF were assigned when its TFBS was found in DNase-seq  
557 narrow peaks in promoter or extended regions for enhancer-promoter association of  
558 genes (EPA). Promoter and extended regions were defined as follows: promoter regions  
559 were those that were within distance of  $\pm 5$  kb from transcriptional start sites (TSS).  
560 Promoter and extended regions were defined as per the following association rule,

561 which is the same as that defined in Figure 3A of a previous study (McLean et al. 2010):  
562 the single nearest gene association rule, which extends the regulatory domain to the  
563 midpoint between the TSS of the gene and that of the nearest gene upstream and  
564 downstream without the limitation of extension length. Extended regions for EPA were  
565 shortened at the DNA binding sites of a TF that was the closest to a TSS, and  
566 transcriptional target genes were predicted from the shortened enhancer regions using  
567 TFBS. Furthermore, promoter and extended regions for EPA were shortened at the  
568 forward–reverse (FR) orientation of DNA binding sites of a TF. When forward or  
569 reverse orientation of DNA binding sites were continuously located in genome  
570 sequences several times, the most internal (i.e. closest to a TSS) forward–reverse  
571 orientation of DNA binding sites were selected. The genomic positions of genes were  
572 identified using ‘knownGene.txt.gz’ file in UCSC bioinformatics sites (Karolchik et al.  
573 2014). The file ‘knownCanonical.txt.gz’ was also utilized for selecting representative  
574 transcripts among various alternate forms for assigning promoter and extended regions  
575 for EPA. From the list of transcription factor binding sequences and transcriptional  
576 target genes, redundant transcription factor binding sequences were removed by  
577 comparing the target genes of a transcription factor binding sequence and its  
578 corresponding TF; if identical, one of the transcription factor binding sequences was  
579 used. When the number of transcriptional target genes predicted from a transcription  
580 factor binding sequence was less than five, the transcription factor binding sequence  
581 was omitted.

582 Repeat DNA sequences were searched from hg19 version of the human reference

583 genome using RepeatMasker (Smit, AFA & Green, P RepeatMasker at  
584 <http://www.repeatmasker.org>) and RepBase RepeatMasker Edition  
585 (<http://www.girinst.org>).

586 For gene expression data, RNA-seq reads mapped onto human hg19 genome  
587 sequences were obtained from UCSF-UBC human reference epigenome mapping  
588 project RNA-seq reads with poly-A of naive CD4<sup>+</sup> T cells (GEO: GSM669617).  
589 RNA-seq reads were aligned in repeat-masked hg19 genome sequences using BWA  
590 with default parameters (Li and Durbin 2009). FPKMs of the RNA-seq data were  
591 calculated using RSeQC (Wang et al. 2012b). For monocytes, Blueprint RNA-seq  
592 FPKM data  
593 ('C0010KB1.transcript\_quantification.rsem\_grape2\_crg.GRCh38.20150622.results')  
594 were downloaded from Blueprint DCC portal  
595 (<http://dcc.blueprint-epigenome.eu/#/files>). RNA-seq reads with poly-A of human  
596 mammary epithelial cells (HMEC) in Encyclopedia of DNA Elements at UCSC  
597 (<http://genome.ucsc.edu/encode/>,  
598 'wgEncodeCshlLongRnaSeqHmecCellPapAlnRep1.bam' file), H1 derived neural  
599 progenitor cell (NPC) (GEO: GSM915326, ENCODE: ENCFF529SIO), Th17  
600 (GSM2859479, NCBI SRA: SRR6298326), Treg (GSM2859476, SRR6298323) and  
601 GM12878 (GSE78551, ENCFF297QCE) were used. Based on log<sub>2</sub>-transformed FPKM,  
602 UCSC transcripts were arranged in descending order of expression level, and top 4,000  
603 transcripts were selected in each cell type.

604 The expression level of transcriptional target genes predicted based on EPAs

605 shortened at the DNA motif sites of a TF was compared with the expression level of  
606 transcriptional target genes predicted from closed chromatin regions in promoters. For  
607 each DNA motif sequence shortening EPAs, transcriptional target genes were predicted  
608 using DNA binding motif sequences of vertebrate TFs in TRANSFAC database, and the  
609 ratio of expression level of putative transcriptional target genes of each TF was  
610 calculated between EPAs and closed chromatin regions in promoters. The distribution of  
611 the ratios of all TFs was compared among forward-reverse (FR), reverse-forward (RF)  
612 and any orientation (i.e. without considering orientation) of a DNA motif sequence  
613 shortening EPAs using Mann-Whitney test, two-sided ( $p$ -value  $< 10^{-7}$ ). Other  
614 parameters for the analysis were that the number of transcriptional target genes of a TF  
615 was  $\geq 50$ , and the number of general TFs (not insulator TFs) to predict transcriptional  
616 target genes was  $\geq 50$ . The number of DNA motif sites of a TF (insulator TF)  
617 shortening EPAs was  $\geq 100$ .

618

### 619 **Comparison with chromatin interaction data**

620 For comparison of EPs with chromatin interactions (HiChIP) in CD4<sup>+</sup> T, Th17,  
621 Treg and GM12878 cells,  
622 ‘GSM2705049\_Naive\_HiChIP\_H3K27ac\_B2T1\_allValidPairs.txt’,  
623 ‘GSM2705050\_Naive\_HiChIP\_H3K27ac\_B2T2\_allValidPairs.txt’,  
624 ‘GSM2705051\_Naive\_HiChIP\_H3K27ac\_B3T1\_allValidPairs.txt’,  
625 ‘GSM2705054\_Th17\_HiChIP\_H3K27ac\_B1T2\_allValidPairs.txt’,  
626 ‘GSM2705055\_Th17\_HiChIP\_H3K27ac\_B2T1\_allValidPairs.txt’,

627 ‘GSM2705056\_Th17\_HiChIP\_H3K27ac\_B3T1\_allValidPairs.txt’,  
628 ‘GSM2705059\_Treg\_HiChIP\_H3K27ac\_B3T1\_allValidPairs.txt’,  
629 ‘GSM2705041\_GM\_HiChIP\_H3K27ac\_B1\_allValidPairs.txt’,  
630 ‘GSM2705042\_GM\_HiChIP\_H3K27ac\_B2\_allValidPairs.txt’ files were downloaded  
631 from Gene Expression Omnibus (GEO) database. The resolutions of chromatin  
632 interactions and EPIs were adjusted to 5 kb before their comparison. Chromatin  
633 interactions with  $\geq 6,000$  and  $\geq 1,000$  counts for each interaction were used in CD4<sup>+</sup> T  
634 cells. According to the unique numbers of chromatin interactions in replications in Th17,  
635 Treg and GM12878 cells, chromatin interactions with  $\geq 1,000$  (B1T2 in Th17),  
636  $\geq 2,000$  (B2T1 and B3T1 in Th17),  $\geq 6,000$  (B3T1 in Treg),  $\geq 4,000$  (B1 and B2 in  
637 GM12878) counts for each interaction were analyzed.

638 Enhancer-promoter interactions (EPIs) were predicted using three types of EPAs  
639 in monocytes: (i) EPA shortened at the FR or RF orientation of DNA motif sites of a TF,  
640 (ii) EPA shortened at the any orientation (i.e. without considering orientation) of DNA  
641 motif sites of a TF, and (iii) EPA without being shortened by a DNA motif site. EPIs  
642 predicted in the three types of EPAs in common were removed. EPIs predicted from  
643 EPA (i) were removed from EPIs predicted from EPA (ii). EPIs predicted from EPA (i)  
644 and (ii) were removed from EPIs predicted from EPA (iii). The resolution of HiChIP  
645 chromatin interaction data was 1-5 kb, so EPIs were adjusted to 5 kb before their  
646 comparison. The number and ratio of EPIs overlapped with chromatin interactions were  
647 compared two times between EPIs (i) and (iii), and EPIs (i) and (ii) (binomial  
648 distribution,  $p$ -value  $< 0.025$  for each test, two-sided, 95% confidence interval).

649 For comparison of EPIs with chromatin interactions (in situ Hi-C) in HMEC,  
650 ‘HMEC\_4DNFI97O9SAZ.pairs.gz’ file was downloaded from 4D nucleome data portal  
651 (<http://data.4dnucleome.org>). The genomic positions of chromatin interactions were  
652 converted into hg19 version of human genome using liftOver tool  
653 (<http://hgdownload.soe.ucsc.edu/downloads.html#liftover>). The resolutions of  
654 chromatin interaction data and EPIs were adjusted to 3 kb before their comparison. All  
655 chromatin interactions were used for analysis. For comparison of EPIs with chromatin  
656 interactions (promoter capture Hi-C) in NPC, ‘GSE86189\_npc.po.all.txt.bz2’ file was  
657 downloaded from GEO database (GSE86189). The resolutions of chromatin interaction  
658 data and EPIs were adjusted to 5 kb before their comparison. All chromatin interactions  
659 were used for analysis.

660 Putative target genes for the comparison of EPIs and chromatin interactions were  
661 selected from top 4,000 transcripts in term of the expression level. The expression level  
662 of putative target genes of EPIs overlapped with chromatin interactions was compared  
663 with EPIs not overlapped with them. When a putative transcriptional target gene of a TF  
664 in an enhancer was found in both an EPI overlapped with a chromatin interaction and an  
665 EPI not overlapped with, the target gene was eliminated. The distribution of expression  
666 level of putative target genes was compared using Mann-Whitney test, two-sided  
667 ( $p$ -value < 0.05).

668

### 669 **Correlation of expression level of gene pairs separated by DNA motif sites of a TF**

670 To examine the correlation of expression level of genes pairs separated by DNA

671 motif sites of a TF, gene expression data among 53 tissues were obtained from  
672 ‘GTEx\_Analysis\_2016-01-15\_v7\_RNASeQCv1.1.8\_gene\_median\_tpm.gct.gz’ file in  
673 GTEx database (<https://gtexportal.org/home/>). The correlation of log2-transformed gene  
674 expression level was analyzed based on protein-coding transcripts of RefSeq (RefSeq  
675 ID with ‘NM\_’). The same genomic location of RefSeq transcripts were removed. DNA  
676 motif sites overlapped with RefSeq transcripts were eliminated. Genes closest to a DNA  
677 motif sites and another gene were analyzed using BEDOPS closest-features (Neph et al.  
678 2012). Mann-Whitney test was performed using R.

679

#### 680 **Co-location of biased orientations of DNA motif sites of TFs**

681 Co-location of biased orientations of DNA binding motif sites of TFs was  
682 examined. The number of genomic regions with the same pair of biased orientations of  
683 DNA motifs of TFs in upstream and downstream of genes in EPAs was counted, and the  
684 same pair of DNA motif sites of TFs found in  $\geq 100$  genomic regions was listed.

685

#### 686 **Acknowledgements**

687 The supercomputing resource was provided by Human Genome Center of the Institute  
688 of Medical Science at the University of Tokyo. Computations were partially performed  
689 on the NIG supercomputer at ROIS National Institute of Genetics. Publication charges  
690 for this article were funded by JSPS KAKENHI Grant Number 16K00387. This  
691 research was partially supported by the Platform Project for Supporting in Drug  
692 Discovery and Life Science Research (Platform for Dynamic Approaches to Living



693 System) from Japan Agency for Medical Research and Development (AMED). This  
694 research was partially supported by Development of Fundamental Technologies for  
695 Diagnosis and Therapy Based upon Epigenome Analysis from Japan Agency for  
696 Medical Research and Development (AMED). This work was partially supported by  
697 JST CREST Grant Number JPMJCR15G1, Japan.  
698

699 **Figures**

700 Web links to original figures.

701 Figure 1. (A) Figure 1. Enhancers and their features. (Shlyueva et al. 2014)

702 <https://static-content.springer.com/esm/art%3A10.1038%2Fnr3682/MediaObjects/415>

703 [76\\_2014\\_BFnr3682\\_MOESM18\\_ESM.ppt](#)

704 Graphical Abstract (de Wit et al. 2015)

705 <https://marlin-prod.literatumonline.com/cms/attachment/7d219941-8398-4373-9ac9-8bf>

706 [92c5eba1d/fx1.jpg](#)

707

708 (B) Supplementary Figure 2. Computationally-defined regulatory domain (McLean et al.

709 2010)

710 <https://static-content.springer.com/esm/art%3A10.1038%2Fnbt.1630/MediaObjects/415>

711 [87\\_2010\\_BFnbt1630\\_MOESM11\\_ESM.pdf](#)

712 Figure 4. The Role of CBS Location and Orientation in CTCF-Mediated Genome-wide

713 DNA Looping (Guo et al. 2015)

714 <https://marlin-prod.literatumonline.com/cms/attachment/297a06ad-7568-483e-9904-9ae>

715 [2af081251/gr4.jpg](#)

716

717 **Figure 1.** Chromatin interaction and enhancer-promoter association. (A) Forward–

718 reverse orientation of CTCF-binding sites are frequently found in chromatin interaction

719 anchors. CTCF can block the interaction between enhancers and promoters limiting the

720 activity of enhancers to certain functional domains (Rao et al. 2014; Shlyueva et al.

721 2014; de Wit et al. 2015; Guo et al. 2015). (B) Computationally-defined regulatory  
722 domains for enhancer-promoter association (McLean et al. 2010). The *single nearest*  
723 *gene* association rule extends the regulatory domain to the midpoint between this gene's  
724 TSS and the nearest gene's TSS both upstream and downstream. Enhancer-promoter  
725 association was shortened at the forward-reverse orientation of DNA binding motif sites  
726 of a transcription factor in this study (e.g. CTCF in the figure).  
727

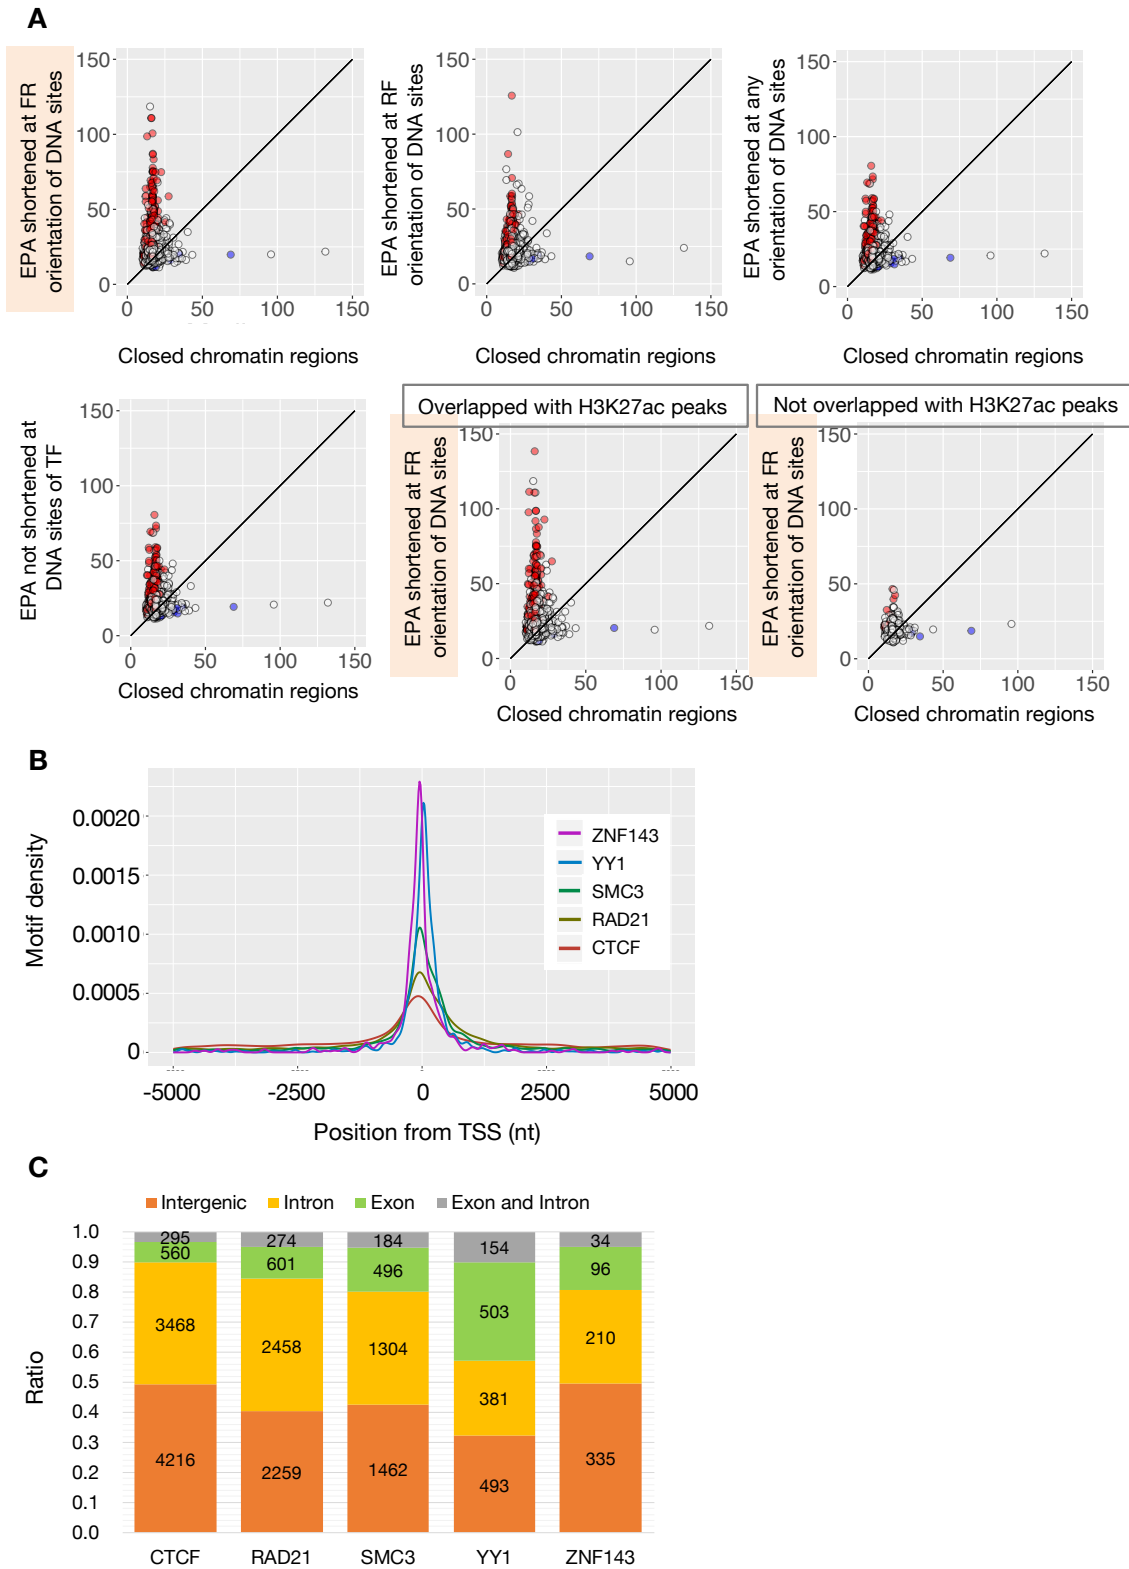

728

729 **Figure 2.** Identification of DNA motif sites of TFs from open chromatin regions and

730 properties of DNA motif sites of TFs. (A) Comparison of expression level of putative

731 transcriptional target genes. Each dot shows the median expression level (FPKM) of  
732 target genes predicted from DNA sites of a transcription factor in closed chromatin  
733 regions (or promoters) (X-axis) and enhancer-promoter association (EPA) shortened at  
734 the forward-reverse orientation of DNA motif sites of CTCF (Y-axis) in T cell (upper  
735 left graph). The distribution of expression level was changed according to four criteria  
736 of EPAs (four graphs) (see Method) (Osato 2018). Red dots show the median expression  
737 level of target genes was significantly higher in EPA than closed chromatin regions, and  
738 blue dots show the median expression level of target genes was significantly lower in  
739 EPA than closed chromatin regions (Mann-Whitney test). The expression level of target  
740 genes predicted in EPA tend to be higher than closed chromatin regions, implying that  
741 TFs acted as activators of target genes. DNA motif sites of TFs overlapped with  
742 H3K27ac ChIP-seq peaks showed significant differences of expression level of target  
743 genes, and DNA motif sites not overlapped with H3K27ac peaks did not show the  
744 difference (lower right two graphs). This suggested that the significant differences of  
745 expression level were associated with enhancer (and promoter) signals of H3K27ac. (B)  
746 Distribution of DNA motif sites of TFs near TSS. ZNF143 and YY1 tend to be located  
747 near TSS, and CTCF tend to be observed more from distant regions than around TSS in  
748 monocyte. (C) Distribution of DNA motif sites of TFs in the human genome in  
749 monocytes. Most of DNA motif sites were found from intergenic and intron regions.  
750 YY1 is known to be at TSS in the edge of exons of genes, and is associated with  
751 transcriptional activation, repression and initiation. YY1 is multi-functional  
752 transcriptional regulator (Shrivastava and Calame 1994; Xi et al. 2007)

753

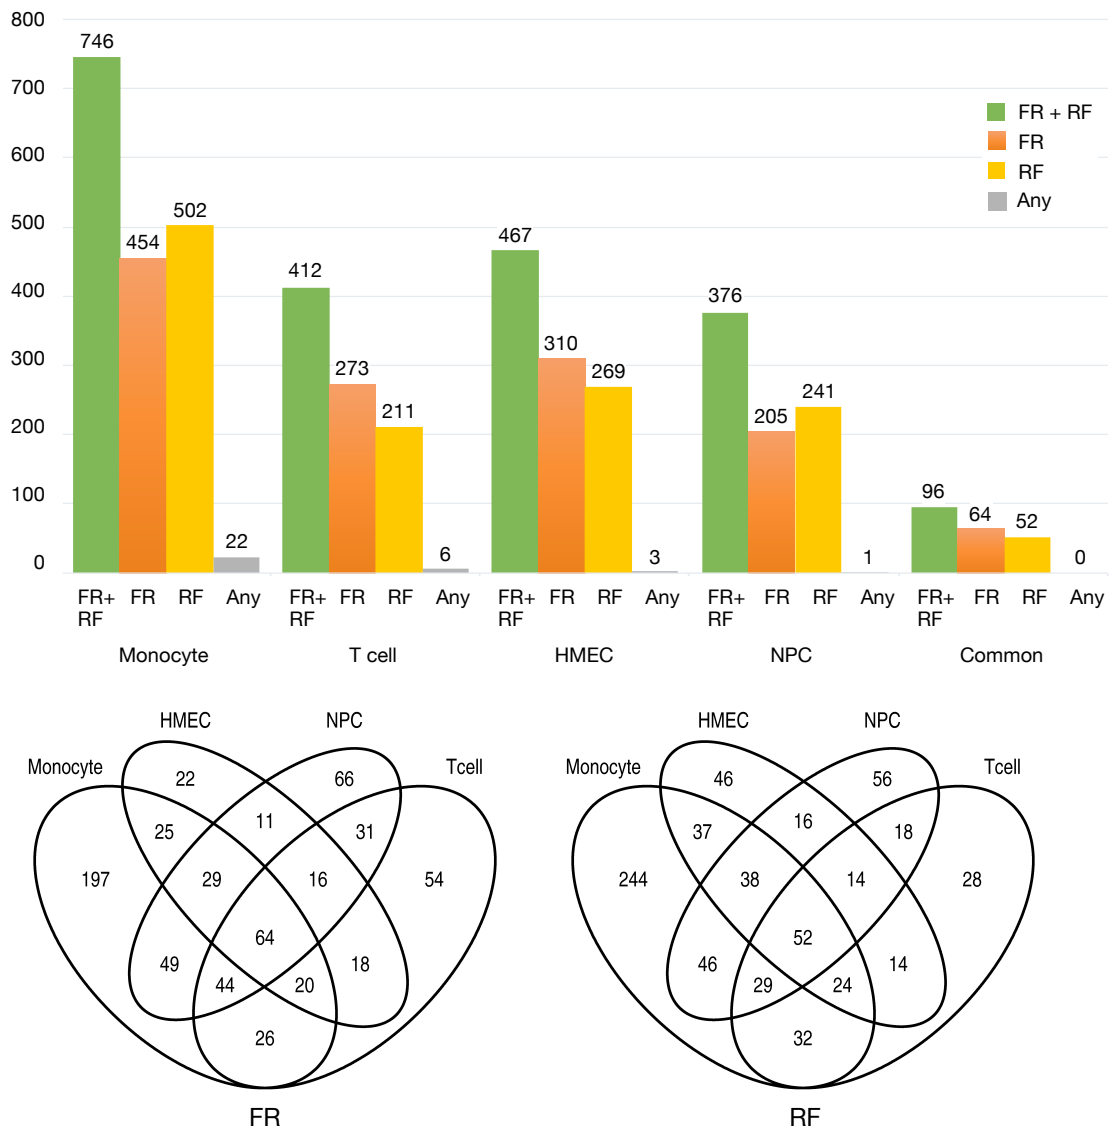

754

755 **Figure 3.** Biased orientations of DNA motif sequences of TFs affecting the transcription  
 756 of genes by putative insulator function of the DNA motif sites. Total 96 (64 FR and 52  
 757 RF) of biased orientations of DNA binding motif sequences of TFs were found to affect  
 758 significantly the expression level of putative transcriptional target genes in monocytes,  
 759 T cells, HMEC and NPC in common, whereas any orientation (i.e. without considering

760 orientation) of DNA binding motif sequence of a TF was not found to affect the  
761 expression level significantly.  
762

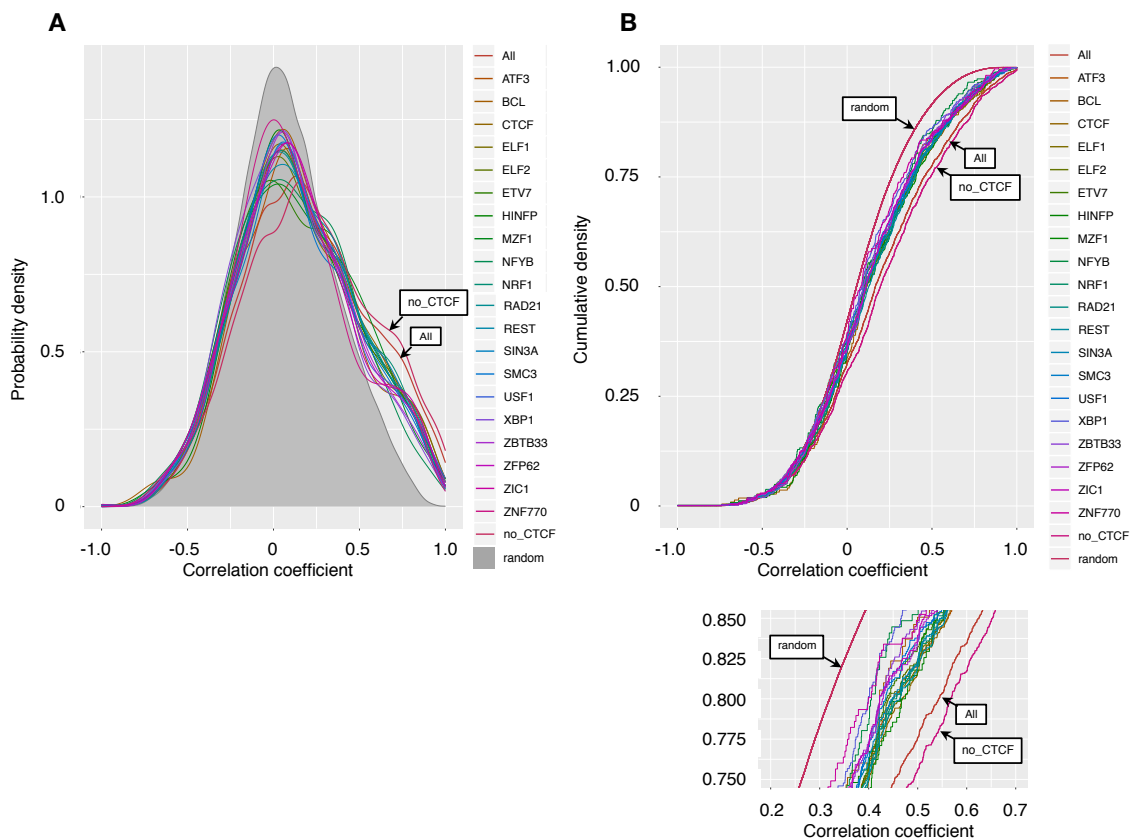

763  
764 **Figure 4.** Genes separated by predicted DNA binding sites of biased orientations of  
765 DNA motifs of TFs are less correlated in gene expression. Top 20 TFs are shown  
766 according to ascending order of median correlation coefficient. Correlation coefficient  
767 between neighboring gene pairs is shown in terms of probability density (A) and  
768 cumulative distribution (B). Brown line (All), correlation between all neighboring  
769 genes; gray shading in (A) and red line (random) in (B), correlation between randomly  
770 chosen gene pairs; Purple line (no\_CTCF), correlation between gene pairs not separated  
771 by predicted CTCF sites.

772 Web links to original figures.

773 Figure 5. Schematic representation of chromatin interactions involving gene promoters

774 (Bailey et al. 2015).

775 <https://www.nature.com/articles/ncomms7186/figures/5>

776

777 **Figure 5.** Schematic representation of chromatin interactions involving gene promoters.

778 ZNF143 contributes the formation of chromatin interactions by directly binding the

779 promoter of genes establishing looping with distal element bound by CTCF (Bailey et al.

780 2015).

781

782



783 **Tables**

784 **Table 1.** Biased orientations of DNA binding motif sequences of TFs in monocytes, T

785 cells, HMEC and NPC. TF: DNA binding motif sequences of transcription factors.

786

787 Forward-reverse orientation

Reverse-forward orientation

| TF          | P-value  | TF           | P-value  | TF            | P-value  | TF          | P-value  | TF            | P-value  |
|-------------|----------|--------------|----------|---------------|----------|-------------|----------|---------------|----------|
| AHR         | 0        | MYC          | 0        | <b>ZNF143</b> | 0        | AP1         | 0        | RFX2          | 0        |
| ARNT        | 0        | MYCN         | 0        | ZNF740        | 0        | ARNT        | 1.26E-11 | RFX5          | 0        |
| ARNTL       | 7.96E-08 | MZF1         | 0        | ZNF770        | 6.51E-08 | ATF3        | 0        | RUNX3         | 0        |
| ATF2        | 3.09E-14 | NFY          | 1.72E-11 | ZNF84         | 0        | BHLHE40     | 8.88E-16 | SP1           | 0        |
| ATF3        | 2.22E-15 | NFYB         | 0        |               |          | CREB1       | 0        | SP2           | 0        |
| BCL         | 0        | NONO         | 0        |               |          | <b>CTCF</b> | 0        | SP4           | 0        |
| BHLHE41     | 5.55E-14 | NRF1         | 1.63E-11 |               |          | E2F         | 2.32E-13 | SPDEF         | 0        |
| CREB3L1     | 0        | OVOL2        | 0        |               |          | E2F3        | 0        | SREBF2        | 0        |
| <b>CTCF</b> | 0        | PLAG1        | 0        |               |          | EFNA2       | 6.61E-11 | STAT          | 0        |
| CXXC1       | 0        | PLAGL1       | 0        |               |          | EGR1        | 0        | TATA          | 0        |
| E2F         | 0        | <b>RAD21</b> | 0        |               |          | EGR2        | 0        | TFAP2B        | 2.00E-15 |
| E2F1        | 0        | REST         | 0        |               |          | ETS1        | 0        | TFAP2C        | 0        |
| EGR1        | 0        | RFX1         | 0        |               |          | FLI1        | 1.05E-13 | TFCP2L1       | 0        |
| EGR3        | 0        | SIN3A        | 0        |               |          | FLI1:FIGLA  | 0        | USF1          | 7.55E-10 |
| EGR4        | 0        | SIX5         | 0        |               |          | FOS         | 0        | YBX1          | 0        |
| ELF1        | 0        | <b>SMC3</b>  | 0        |               |          | GMEB2       | 0        | <b>YY1</b>    | 0        |
| ELF2        | 5.74E-13 | SP2          | 1.04E-11 |               |          | HIF1A       | 0        | YY2           | 0        |
| ELK3        | 3.33E-15 | TFAP2A       | 0        |               |          | KLF4        | 0        | ZBTB33        | 0        |
| ELK4        | 6.19E-11 | TFAP2B       | 2.22E-16 |               |          | MITF        | 0        | ZBTB7B        | 0        |
| ERG         | 0        | TFAP2C       | 0        |               |          | MYB         | 0        | ZNF100        | 6.22E-14 |
| ETS         | 0        | TP73         | 0        |               |          | MYC         | 0        | <b>ZNF143</b> | 0        |
| ETS1        | 0        | USF1         | 0        |               |          | MYCN        | 0        | ZNF432        | 0        |
| ETV7        | 2.31E-08 | XBP1         | 0        |               |          | MZF1        | 0        |               |          |
| HEY2        | 0        | <b>YY1</b>   | 0        |               |          | NFKB1       | 0        |               |          |
| HIC1        | 0        | YY2          | 0        |               |          | NFYA        | 2.31E-13 |               |          |
| HINFP       | 6.46E-14 | ZBTB33       | 0        |               |          | NR3C1       | 0        |               |          |
| INSM1       | 2.22E-16 | ZBTB7A       | 0        |               |          | NRF1        | 0        |               |          |
| KLF4        | 0        | ZFP62        | 0        |               |          | OSR2        | 0        |               |          |
| KLF7        | 9.07E-09 | ZFX          | 0        |               |          | PBX3        | 0        |               |          |
| MAX         | 0        | ZIC1         | 0        |               |          | PLAG1       | 2.78E-14 |               |          |

788

789

790 **Table 2.** Comparison of enhancer-promoter interactions (EPIs) with chromatin  
 791 interactions in T cells. The upper tables show the number of biased orientations of DNA  
 792 motifs, where a significantly higher ratio of EPIs predicted based on enhancer-promoter  
 793 association (EPA) (i) overlapped with HiChIP chromatin interactions than the other  
 794 types of EPA (ii) and (iii). The middle tables show 133 FR and 90 RF orientations of  
 795 DNA motifs in T cells found in common among B2T1, B2T2 and B3T1 replications in  
 796 the upper table. The lower tables show that among 64 FR and 52 RF biased orientations  
 797 of DNA motifs found in common in monocytes, T cell, HMEC and NPC, 44 (69%) FR  
 798 and 28 (54%) RF were matched with the analysis of HiChIP chromatin interactions for  
 799 three types of EPAs. TF: DNA binding motif sequence of a transcription factor. Score: –  
 800  $\log_{10}$  (*p*-value). Score 1: Comparison of EPAs shortened at the FR or RF orientation of  
 801 DNA motif sites [EPA (i)] with EPA not shortened [EPA (iii)]. Score 2: Comparison of  
 802 EPAs shortened at the FR or RF orientation of DNA motif sites [EPA (i)] with EPAs  
 803 shortened at the any orientation of DNA motif sites [EPA (ii)].

**1. Comparison of EPI with HiChIP data among three EPA (i), (ii) and (iii)**

| Replication of HiChIP data                    | Total no. (FR + RF)<br>of DNA motifs | No. of FR<br>DNA motifs | No. of RF<br>DNA motifs |
|-----------------------------------------------|--------------------------------------|-------------------------|-------------------------|
| B2T1                                          | 226                                  | 153                     | 101                     |
| B2T2                                          | 221                                  | 149                     | 98                      |
| B3T1                                          | 237                                  | 160                     | 109                     |
| DNA motifs found in common among replications |                                      |                         |                         |
| B2T1 and B2T2                                 | 212                                  | 141                     | 95                      |
| B2T1 and B3T1                                 | 212                                  | 143                     | 93                      |
| B2T2 and B3T1                                 | 208                                  | 138                     | 93                      |
| B2T1, B2T2 and B3T1                           | 201                                  | 133                     | 90                      |

**2. Comparison of EPI with HiChIP data between two EPA (i) and (iii)**

| Replication of HiChIP data                    | Total no. (FR + RF)<br>of DNA motifs | No. of FR<br>DNA motifs | No. of RF<br>DNA motifs |
|-----------------------------------------------|--------------------------------------|-------------------------|-------------------------|
| B2T1                                          | 395                                  | 262                     | 205                     |
| B2T2                                          | 398                                  | 264                     | 204                     |
| B3T1                                          | 394                                  | 263                     | 203                     |
| DNA motifs found in common among replications |                                      |                         |                         |
| B2T1 and B2T2                                 | 394                                  | 262                     | 202                     |
| B2T1 and B3T1                                 | 391                                  | 261                     | 202                     |
| B2T2 and B3T1                                 | 392                                  | 262                     | 200                     |
| B2T1, B2T2 and B3T1                           | 390                                  | 261                     | 199                     |

804

805

806 Forward-reverse (FR)

| TF          | Score 1 | Score 2 | TF           | Score 1 | Score 2 | TF           | Score 1 | Score 2 |
|-------------|---------|---------|--------------|---------|---------|--------------|---------|---------|
| AHR         | 38.81   | 13.41   | ETS2         | 208.78  | 13.99   | MNT          | 215.63  | 8.00    |
| ARNTL       | 155.78  | 1.96    | ETV1         | 153.32  | 7.02    | MTF1         | 323.31  | 14.21   |
| ATF1        | 323.31  | 15.00   | ETV3         | 140.11  | 14.58   | MXI1         | 323.31  | 70.98   |
| ATF3        | 323.31  | 35.22   | ETV5:EVX1    | 145.48  | 17.33   | MYC          | 84.79   | 24.93   |
| BCL         | 153.72  | 3.52    | ETV5:HES7    | 8.76    | 8.74    | MYCN         | 165.16  | 25.87   |
| CREB        | 90.91   | 2.32    | ETV5:TCF3    | 203.52  | 5.90    | MZF1         | 81.83   | 2.29    |
| CREB3       | 323.31  | 38.74   | FOXN4        | 73.43   | 5.59    | NFKB1        | 279.24  | 14.27   |
| CREB3L1     | 323.31  | 27.96   | FOXO1:ELK3   | 323.31  | 43.51   | NFKB1:NFKB1  | 323.31  | 13.79   |
| <b>CTCF</b> | 323.31  | 3.50    | GABPA        | 197.57  | 20.39   | NFY          | 323.31  | 3.42    |
| CTCFL       | 174.90  | 2.09    | GABPA:GABPB1 | 142.28  | 6.10    | NONO         | 323.31  | 9.24    |
| CXXC1       | 69.92   | 3.30    | GCM2         | 13.68   | 18.80   | NR2C2        | 323.31  | 3.64    |
| E2          | 323.31  | 20.15   | GDNF         | 286.73  | 3.15    | NRF1         | 45.13   | 30.75   |
| E2F         | 122.12  | 21.87   | GMEB1        | 136.68  | 10.56   | OVOL2        | 323.31  | 31.61   |
| E2F1        | 43.22   | 2.85    | HIC1         | 223.55  | 4.56    | PATZ1        | 101.85  | 9.30    |
| EGR1        | 79.09   | 3.79    | HIF1A        | 241.47  | 1.71    | PLAG1        | 177.90  | 11.02   |
| EGR2        | 176.69  | 4.53    | HOXB2:ETV1   | 102.22  | 2.42    | PURA         | 196.04  | 17.98   |
| EGR3        | 85.25   | 34.18   | ID2          | 323.31  | 14.52   | R            | 22.49   | 3.99    |
| EHF         | 323.31  | 8.66    | INSM1        | 193.85  | 15.87   | <b>RAD21</b> | 258.21  | 4.81    |
| ELF1        | 203.38  | 3.86    | JUN:JUNB     | 275.78  | 6.48    | RBAK         | 267.43  | 11.25   |
| ELF2        | 227.62  | 7.83    | JUNB:JUN     | 202.73  | 5.07    | RELA         | 323.31  | 4.68    |
| ELF5        | 323.31  | 8.76    | KLF          | 252.10  | 8.35    | RFX1         | 159.78  | 17.05   |
| ELK1:TBX21  | 126.46  | 8.41    | KLF15        | 323.31  | 22.56   | RFX4         | 323.31  | 35.28   |
| ELK1:TEF    | 323.31  | 7.99    | KLF17        | 87.51   | 14.77   | RFX5         | 323.31  | 26.52   |
| ELK4        | 117.83  | 4.81    | KLF2         | 90.74   | 15.34   | SAP1         | 124.23  | 14.63   |
| ENO1        | 80.42   | 3.13    | KLF4         | 209.71  | 9.38    | <b>SMC3</b>  | 222.09  | 1.76    |
| EPAS1       | 65.43   | 7.76    | KLF7         | 229.95  | 11.96   | SP1          | 235.48  | 29.09   |
| ERF         | 207.67  | 6.25    | LHX8         | 244.38  | 2.95    | SP2          | 94.11   | 9.54    |
| ERG         | 199.81  | 25.70   | MAX          | 323.31  | 8.35    | SP4          | 14.30   | 6.31    |
| ETS         | 196.80  | 1.63    | MAZ          | 109.42  | 3.37    | SPDEF        | 179.39  | 16.81   |
| ETS1        | 308.00  | 3.92    | MBD2         | 8.41    | 1.95    | SPIC         | 323.31  | 28.49   |

807

| TF            | Score 1 | Score 2 | TF     | Score 1 | Score 2 |
|---------------|---------|---------|--------|---------|---------|
| STAT          | 84.60   | 1.69    | ZNF322 | 120.49  | 11.55   |
| STAT1         | 323.31  | 5.38    | ZNF325 | 69.42   | 2.74    |
| TCF12         | 111.44  | 16.79   | ZNF408 | 214.73  | 2.22    |
| TCF3          | 323.31  | 14.05   | ZNF467 | 127.21  | 4.64    |
| TEAD4:ETV4    | 226.28  | 5.90    | ZNF479 | 226.76  | 3.26    |
| TFAP2A        | 25.86   | 20.26   | ZNF48  | 106.17  | 9.88    |
| TFAP2B        | 90.03   | 6.10    | ZNF511 | 84.74   | 9.87    |
| TFAP2C        | 169.60  | 8.55    | ZNF553 | 93.45   | 9.17    |
| TFAP4         | 93.98   | 2.36    | ZNF555 | 232.83  | 7.63    |
| TFE3          | 139.21  | 16.71   | ZNF624 | 235.50  | 3.84    |
| TP73          | 198.45  | 7.75    | ZNF672 | 266.64  | 10.80   |
| TR4           | 39.01   | 4.97    | ZNF675 | 323.31  | 5.81    |
| USF1          | 194.06  | 3.56    | ZNF676 | 323.31  | 16.54   |
| VEZF1         | 134.36  | 3.49    |        |         |         |
| XBP1          | 323.31  | 44.58   |        |         |         |
| XRCC5:XRCC6   | 132.56  | 3.92    |        |         |         |
| <b>YY1</b>    | 62.59   | 5.30    |        |         |         |
| ZBED6         | 183.14  | 20.23   |        |         |         |
| ZBTB17        | 48.37   | 7.27    |        |         |         |
| ZBTB26        | 151.91  | 16.84   |        |         |         |
| ZBTB5         | 120.19  | 9.58    |        |         |         |
| ZBTB7A        | 52.89   | 30.58   |        |         |         |
| ZFX           | 13.33   | 14.55   |        |         |         |
| ZFY           | 36.57   | 4.04    |        |         |         |
| ZIC3          | 266.75  | 10.54   |        |         |         |
| ZIC4          | 17.27   | 9.30    |        |         |         |
| ZNF140        | 323.31  | 4.99    |        |         |         |
| <b>ZNF143</b> | 323.31  | 35.38   |        |         |         |
| ZNF165        | 323.31  | 7.80    |        |         |         |
| ZNF25         | 281.69  | 7.72    |        |         |         |

808

809

810 Reverse-forward (RF)

| TF          | Score 1 | Score 2 | TF     | Score 1 | Score 2 | TF            | Score 1 | Score 2 |
|-------------|---------|---------|--------|---------|---------|---------------|---------|---------|
| ARNT        | 323.31  | 14.12   | MAX    | 304.34  | 8.64    | TFE3          | 95.23   | 10.59   |
| ARNT2       | 41.41   | 42.78   | MLXIPL | 64.44   | 10.74   | THAP1         | 127.72  | 5.07    |
| ASCL2       | 138.15  | 6.41    | MUSCLE | 23.05   | 3.47    | <b>YY1</b>    | 323.31  | 9.92    |
| ATF3        | 323.31  | 14.64   | MYB    | 323.31  | 17.68   | YY2           | 47.49   | 2.61    |
| ATF4        | 323.31  | 25.14   | MYBL1  | 316.23  | 23.27   | ZBTB33        | 90.29   | 7.78    |
| ATF7        | 79.30   | 4.96    | MYC    | 323.31  | 12.23   | ZBTB45        | 323.31  | 57.08   |
| BCLAF1      | 148.24  | 8.52    | MZF1   | 200.49  | 22.73   | ZBTB7A        | 89.19   | 16.19   |
| BHLHE40     | 323.31  | 12.42   | NFY    | 209.97  | 3.22    | ZBTB7B        | 43.90   | 23.59   |
| CDCA7L      | 84.72   | 8.42    | NFYA   | 323.31  | 11.75   | ZFP64         | 147.00  | 13.59   |
| CREB3       | 206.55  | 11.07   | NHLH1  | 105.19  | 4.42    | ZIC3          | 42.65   | 15.39   |
| CREB3L1     | 323.31  | 7.63    | NR1H3  | 323.31  | 9.38    | ZNF100        | 27.67   | 4.75    |
| CREB3L2     | 67.51   | 7.98    | NR3C1  | 43.16   | 8.31    | <b>ZNF143</b> | 63.03   | 9.69    |
| <b>CTCF</b> | 240.61  | 4.56    | OSR2   | 111.77  | 14.65   | ZNF148        | 213.77  | 18.93   |
| E2F         | 78.16   | 7.07    | RFX1   | 323.31  | 22.99   | ZNF16         | 323.31  | 47.43   |
| E2F1        | 124.10  | 15.73   | RXRA   | 146.30  | 15.11   | ZNF37A        | 310.67  | 14.79   |
| E2F3        | 65.67   | 8.85    | SALL1  | 277.84  | 1.91    | ZNF410        | 140.45  | 13.57   |
| E2F6        | 165.75  | 30.69   | SCRT2  | 301.48  | 9.60    | ZNF419        | 247.63  | 11.25   |
| EFNA2       | 255.01  | 10.95   | SMAD6  | 259.24  | 7.43    | ZNF429        | 87.05   | 32.39   |
| ELK3        | 143.48  | 7.57    | SP100  | 20.75   | 7.99    | ZNF436        | 323.31  | 11.48   |
| EP300       | 121.01  | 10.90   | SP2    | 294.86  | 2.59    | ZNF468        | 21.12   | 7.67    |
| ETV5:CLOCK  | 42.10   | 7.29    | SP4    | 110.94  | 19.63   | ZNF557        | 299.44  | 9.58    |
| GLIS2       | 37.40   | 17.34   | SPDEF  | 185.85  | 14.35   | ZNF575        | 39.45   | 14.38   |
| GMEB2       | 323.31  | 7.81    | SPZ1   | 323.31  | 9.87    | ZNF586        | 260.73  | 6.18    |
| HES1        | 88.18   | 9.46    | SREBF1 | 67.27   | 15.74   | ZNF611        | 279.80  | 15.65   |
| HES7        | 166.52  | 14.60   | SREBF2 | 297.27  | 1.62    | ZNF616        | 189.53  | 30.98   |
| HIVEP1      | 323.31  | 4.90    | TAF1   | 252.27  | 17.47   | ZNF692        | 202.47  | 2.33    |
| HOXB2:ELK1  | 217.94  | 11.92   | TATA   | 2.16    | 4.02    | ZNF727        | 214.01  | 17.22   |
| IRC900814   | 323.31  | 4.89    | TFAP2A | 20.17   | 29.15   | ZNF770        | 300.52  | 4.71    |
| KLF4        | 213.35  | 9.49    | TFAP2B | 29.46   | 12.62   | ZNF773        | 150.45  | 8.84    |
| KLF8        | 323.31  | 17.42   | TFAP2C | 112.10  | 51.21   | ZSCAN21       | 323.31  | 5.55    |

811

812

813 Forward-reverse (FR)

Reverse-forward (RF)

| TF          | Score 1 | Score 2 | TF            | Score 1 | Score 2 | TF            | Score 1 | Score 2 |
|-------------|---------|---------|---------------|---------|---------|---------------|---------|---------|
| AHR         | 38.81   | 13.41   | <b>RAD21</b>  | 258.21  | 4.81    | ARNT          | 323.31  | 14.12   |
| ARNTL       | 155.78  | 1.96    | RFX1          | 159.78  | 17.05   | ATF3          | 323.31  | 14.64   |
| ATF3        | 323.31  | 35.22   | <b>SMC3</b>   | 222.09  | 1.76    | BHLHE40       | 323.31  | 12.42   |
| BCL         | 153.72  | 3.52    | SP2           | 94.11   | 9.54    | <b>CTCF</b>   | 240.61  | 4.56    |
| CREB3L1     | 323.31  | 27.96   | TFAP2A        | 25.86   | 20.26   | E2F           | 78.16   | 7.07    |
| <b>CTCF</b> | 323.31  | 3.50    | TFAP2B        | 90.03   | 6.10    | E2F3          | 65.67   | 8.85    |
| CXXC1       | 69.92   | 3.30    | TFAP2C        | 169.60  | 8.55    | EFNA2         | 255.01  | 10.95   |
| E2F         | 122.12  | 21.87   | TP73          | 198.45  | 7.75    | GMEB2         | 323.31  | 7.81    |
| E2F1        | 43.22   | 2.85    | USF1          | 194.06  | 3.56    | KLF4          | 213.35  | 9.49    |
| EGR1        | 79.09   | 3.79    | XBP1          | 323.31  | 44.58   | MYB           | 323.31  | 17.68   |
| EGR3        | 85.25   | 34.18   | <b>YY1</b>    | 62.59   | 5.30    | MYC           | 323.31  | 12.23   |
| ELF1        | 203.38  | 3.86    | ZBTB7A        | 52.89   | 30.58   | MZF1          | 200.49  | 22.73   |
| ELF2        | 227.62  | 7.83    | ZFX           | 13.33   | 14.55   | NFYA          | 323.31  | 11.75   |
| ELK4        | 117.83  | 4.81    | <b>ZNF143</b> | 323.31  | 35.38   | NR3C1         | 43.16   | 8.31    |
| ERG         | 199.81  | 25.70   |               |         |         | OSR2          | 111.77  | 14.65   |
| ETS         | 196.80  | 1.63    |               |         |         | SP2           | 294.86  | 2.59    |
| ETS1        | 308.00  | 3.92    |               |         |         | SP4           | 110.94  | 19.63   |
| HIC1        | 223.55  | 4.56    |               |         |         | SPDEF         | 185.85  | 14.35   |
| INSM1       | 193.85  | 15.87   |               |         |         | SREBF2        | 297.27  | 1.62    |
| KLF4        | 209.71  | 9.38    |               |         |         | TATA          | 2.16    | 4.02    |
| KLF7        | 229.95  | 11.96   |               |         |         | TFAP2B        | 29.46   | 12.62   |
| MAX         | 323.31  | 8.35    |               |         |         | TFAP2C        | 112.10  | 51.21   |
| MYC         | 84.79   | 24.93   |               |         |         | <b>YY1</b>    | 323.31  | 9.92    |
| MYCN        | 165.16  | 25.87   |               |         |         | YY2           | 47.49   | 2.61    |
| MZF1        | 81.83   | 2.29    |               |         |         | ZBTB33        | 90.29   | 7.78    |
| NFY         | 323.31  | 3.42    |               |         |         | ZBTB7B        | 43.90   | 23.59   |
| NONO        | 323.31  | 9.24    |               |         |         | ZNF100        | 27.67   | 4.75    |
| NRF1        | 45.13   | 30.75   |               |         |         | <b>ZNF143</b> | 63.03   | 9.69    |
| OVOL2       | 323.31  | 31.61   |               |         |         |               |         |         |
| PLAG1       | 177.90  | 11.02   |               |         |         |               |         |         |

814

815

816

817 **Table 3.** Correlation of expression level of gene pairs separated by DNA motif sites of a  
818 TF. Pairs of genes separated by 64 FR and 52 RF orientations of DNA motif sites of TFs  
819 found in common in monocytes, T cells, HMEC and NPC were analyzed to find  
820 significantly lower correlation of their expression level than the correlation of all pairs  
821 of nearby genes among 53 tissues. Score:  $-\log_{10}$  ( $p$ -value) of Mann-Whitney test.  
822 Median correlation: median correlation coefficient of expression level of nearby gene  
823 pairs separated by DNA motif sites. The median correlation coefficient of expression  
824 level of all pairs of nearby genes is 0.17. # DNA site: number of DNA motif sites of a  
825 TF separating gene pairs with expression data. Ubiquitously expressed genes with

826 coefficient of variance <90 and DNA motif sites nearby were not used for statistical test,  
 827 so the number of DNA motif sites was relatively small. The results using all genes were  
 828 shown in Supplemental material. All DNA motif sites of a TF were used including DNA  
 829 motif sites examined for the biased orientations of DNA motif sites of a TF in EPAs.  
 830 The results using only the biased orientations of DNA motif sites of a TF were shown in  
 831 Supplemental material.

832

833 Forward-reverse (FR)

Reverse-forward (RF)

| TF           | Score | Median correlation | # DNA site | TF            | Score | Median correlation | # DNA site |
|--------------|-------|--------------------|------------|---------------|-------|--------------------|------------|
| AHR          | 1.80  | 0.12               | 520        | AP1           | 3.87  | 0.11               | 744        |
| ARNT         | 1.35  | 0.09               | 141        | ARNT          | 2.95  | 0.10               | 453        |
| ATF2         | 1.40  | 0.11               | 166        | ATF3          | 4.34  | 0.10               | 665        |
| ATF3         | 3.61  | 0.11               | 795        | BHLHE40       | 2.49  | 0.07               | 155        |
| BHLHE41      | 2.02  | 0.07               | 118        | CREB1         | 1.79  | 0.11               | 303        |
| CREB3L1      | 2.88  | 0.05               | 127        | <b>CTCF</b>   | 5.96  | 0.09               | 721        |
| <b>CTCF</b>  | 6.02  | 0.09               | 837        | E2F           | 3.95  | 0.10               | 663        |
| E2F          | 3.73  | 0.10               | 444        | E2F3          | 4.05  | 0.09               | 616        |
| E2F1         | 3.79  | 0.11               | 868        | EFNA2         | 3.51  | 0.10               | 543        |
| EGR1         | 2.97  | 0.10               | 391        | EGR1          | 2.58  | 0.10               | 428        |
| ELF1         | 4.86  | 0.10               | 714        | EGR2          | 1.39  | 0.13               | 747        |
| ELF2         | 3.88  | 0.11               | 781        | ETS1          | 3.75  | 0.11               | 667        |
| ELK3         | 1.86  | 0.12               | 547        | FLI1:FIGLA    | 5.41  | 0.08               | 428        |
| ELK4         | 2.44  | 0.11               | 663        | FOS           | 3.51  | 0.11               | 777        |
| ETS          | 3.34  | 0.11               | 523        | GMEB2         | 1.36  | 0.09               | 310        |
| ETS1         | 4.27  | 0.11               | 687        | HIF1A         | 2.34  | 0.11               | 448        |
| ETV7         | 3.68  | 0.11               | 662        | KLF4          | 2.21  | 0.12               | 744        |
| HIC1         | 1.65  | 0.11               | 380        | MITF          | 3.14  | 0.10               | 419        |
| HINFP        | 1.33  | 0.09               | 258        | MYC           | 4.85  | 0.10               | 704        |
| KLF4         | 2.00  | 0.13               | 718        | MYCN          | 2.79  | 0.10               | 507        |
| MYC          | 3.86  | 0.11               | 762        | NFKB1         | 1.59  | 0.11               | 342        |
| MYCN         | 2.36  | 0.11               | 583        | NFYA          | 2.15  | 0.10               | 229        |
| MZF1         | 1.74  | 0.10               | 261        | NRF1          | 2.01  | 0.12               | 615        |
| NFYB         | 2.97  | 0.10               | 264        | OSR2          | 1.99  | 0.12               | 301        |
| NRF1         | 2.21  | 0.11               | 640        | PBX3          | 2.20  | 0.11               | 253        |
| PLAG1        | 2.93  | 0.10               | 503        | RFX2          | 2.12  | 0.09               | 168        |
| PLAGL1       | 2.55  | 0.10               | 414        | RFX5          | 3.03  | 0.05               | 75         |
| <b>RAD21</b> | 6.08  | 0.09               | 852        | RUNX3         | 2.01  | 0.11               | 241        |
| REST         | 4.35  | 0.11               | 920        | SP1           | 2.73  | 0.11               | 725        |
| RFX1         | 2.38  | 0.08               | 81         | SP2           | 2.15  | 0.12               | 1090       |
| SIN3A        | 3.31  | 0.11               | 813        | SP4           | 2.33  | 0.11               | 479        |
| <b>SMC3</b>  | 6.18  | 0.09               | 625        | SPDEF         | 5.29  | 0.07               | 449        |
| SP2          | 2.30  | 0.12               | 738        | TFAP2B        | 3.42  | 0.11               | 855        |
| TFAP2A       | 4.17  | 0.11               | 767        | TFAP2C        | 2.05  | 0.11               | 576        |
| TFAP2C       | 2.13  | 0.11               | 470        | TFCP2L1       | 1.45  | 0.13               | 362        |
| USF1         | 4.24  | 0.10               | 628        | YBX1          | 1.34  | 0.13               | 160        |
| XBP1         | 6.65  | 0.07               | 379        | <b>YY1</b>    | 2.23  | 0.01               | 50         |
| ZBTB33       | 4.90  | 0.10               | 701        | ZBTB33        | 3.44  | 0.11               | 886        |
| ZBTB7A       | 2.82  | 0.10               | 485        | ZBTB7B        | 2.27  | 0.13               | 892        |
| ZFP62        | 2.95  | 0.11               | 565        | <b>ZNF143</b> | 2.26  | 0.07               | 81         |
| ZFX          | 2.69  | 0.11               | 581        |               |       |                    |            |
| ZIC1         | 4.47  | 0.11               | 829        |               |       |                    |            |
| ZNF770       | 3.38  | 0.08               | 271        |               |       |                    |            |

834

835 **Table 4.** Top 30 of co-location and overlapping biased orientations of DNA binding  
 836 motif sequences of TFs in monocytes. Co-location and overlapping DNA motif  
 837 sequences of CTCF with another biased orientation of DNA motif sequence were shown  
 838 in separate tables. Motif 1,2: DNA binding motif sequences of TFs. No.: the number of  
 839 genomic locations with both Motif 1 and Motif 2 in upstream and downstream of genes  
 840 in EPAs (< 1 Mb distance from TSS of genes). Total number of genes is 30,523.

841

842 Forward-reverse (FR)

| Motif 1      | Motif 2      | No.  | Mean of distances bet. DNA sites (nt) | Median of distances bet. DNA sites (nt) | Mean of distances from TSS (nt) | Median of distances from TSS (nt) | Interquartile range of distance from TSS (nt) |
|--------------|--------------|------|---------------------------------------|-----------------------------------------|---------------------------------|-----------------------------------|-----------------------------------------------|
| FOS          | JUN          | 3332 | 0.00                                  | 0                                       | 43202.95                        | 18085                             | 5524 - 48583                                  |
| <b>CTCF</b>  | <b>SMC3</b>  | 2876 | 0.01                                  | 0                                       | 34606.92                        | 13716                             | 3073 - 39471                                  |
| FOSL2        | JUN          | 2807 | 0.00                                  | 0                                       | 40389.84                        | 17365                             | 5424 - 45251                                  |
| FOSB         | FOSL2        | 2644 | 0.00                                  | 0                                       | 44302.93                        | 17867                             | 5633 - 47209                                  |
| EGR1         | EGR2         | 2397 | 0.00                                  | 0                                       | 14578.21                        | 1251                              | 247 - 11473                                   |
| <b>CTCF</b>  | <b>RAD21</b> | 2352 | 0.00                                  | 0                                       | 33492.68                        | 12913                             | 2824 - 37672                                  |
| <b>RAD21</b> | <b>SMC3</b>  | 2343 | 0.02                                  | 0                                       | 33572.80                        | 14302                             | 3856 - 37159                                  |
| ATF3         | FOSL2        | 2322 | 0.00                                  | 0                                       | 42784.04                        | 17841                             | 5366 - 48236                                  |
| FOSL2        | JUNB         | 2305 | 0.02                                  | 0                                       | 42884.36                        | 17867                             | 5706 - 46515                                  |
| ETS2         | ETSLIKE      | 2205 | 0.00                                  | 0                                       | 37660.66                        | 15765                             | 4146 - 41462                                  |
| FOS          | JUNB         | 2151 | 0.00                                  | 0                                       | 38403.20                        | 16367                             | 4849 - 44736                                  |
| IRF          | IRF4         | 1962 | 0.00                                  | 0                                       | 40794.41                        | 15872                             | 3969 - 45946                                  |
| FOSL2        | SMARCC1      | 1945 | 0.00                                  | 0                                       | 42429.69                        | 17369                             | 5094 - 46586                                  |
| EGR1         | WT1          | 1941 | 0.16                                  | 0                                       | 12485.23                        | 427                               | 93 - 5394                                     |
| FOSB         | JUN          | 1808 | 0.02                                  | 0                                       | 36648.74                        | 16705                             | 5156 - 40309                                  |
| ATF3         | JUN          | 1713 | 0.02                                  | 0                                       | 38101.24                        | 17119                             | 5294 - 43559                                  |
| JUN          | TFAP2A       | 1628 | 0.00                                  | 0                                       | 42262.97                        | 18017                             | 5089 - 47094                                  |
| FOSL2        | TFAP2A       | 1628 | 0.00                                  | 0                                       | 36606.38                        | 16201                             | 4949 - 41948                                  |
| BACH2        | SMARCC1      | 1462 | 0.16                                  | 0                                       | 38673.02                        | 14778                             | 4060 - 41262                                  |
| ELF1         | ETS1         | 1459 | 0.00                                  | 0                                       | 37056.72                        | 14346                             | 3370 - 40339                                  |
| CHD2         | E2F          | 1429 | 0.00                                  | 0                                       | 19220.38                        | 1579                              | 329 - 16257                                   |
| JUN          | NR3C1        | 1262 | 0.00                                  | 0                                       | 35052.17                        | 14418                             | 3844 - 38534                                  |
| USF1         | USF2         | 1260 | 0.00                                  | 0                                       | 25188.91                        | 4726                              | 413 - 24699                                   |
| BACH2        | JUNB         | 1238 | 0.15                                  | 0                                       | 36252.37                        | 15302                             | 4462 - 39393                                  |
| BACH2        | FOSB         | 1184 | 0.22                                  | 0                                       | 37190.80                        | 14778                             | 4038 - 41262                                  |
| ETSLIKE      | GABPA        | 1164 | 0.00                                  | 0                                       | 32352.24                        | 11683                             | 2356 - 36919                                  |
| <b>CTCF</b>  | <b>CTCF</b>  | 1151 | 0.00                                  | 0                                       | 30252.04                        | 11606                             | 2229 - 34539                                  |
| NR5A1        | NR5A2        | 1133 | 0.00                                  | 0                                       | 41171.86                        | 12243                             | 2488 - 43136                                  |
| ATF3         | BACH2        | 1094 | 0.18                                  | 0                                       | 35659.16                        | 13605                             | 3821 - 39756                                  |
| ETS2         | GABPA        | 1092 | 0.06                                  | 0                                       | 27250.24                        | 12184                             | 2858 - 32196                                  |

843

844

845

846

847 Reverse-forward (RF)

| Motif 1     | Motif 2     | No.  | Mean of distances bet. DNA sites (nt) | Median of distances bet. DNA sites (nt) | Mean of distances from TSS (nt) | Median of distances from TSS (nt) | Interquartile range of distance from TSS (nt) |
|-------------|-------------|------|---------------------------------------|-----------------------------------------|---------------------------------|-----------------------------------|-----------------------------------------------|
| EGR1        | EGR3        | 3012 | 0.00                                  | 0                                       | 17005.00                        | 709                               | 149 - 10393                                   |
| NR1I2       | NR1I3       | 2932 | 0.00                                  | 0                                       | 49622.84                        | 20548                             | 5924 - 58436                                  |
| ZIC1        | ZIC3        | 2871 | 0.07                                  | 0                                       | 21511.64                        | 3092                              | 434 - 19128                                   |
| EGR         | WT1         | 2612 | 0.04                                  | 0                                       | 9949.38                         | 396                               | 102 - 4266                                    |
| FOS         | FOS:JUN     | 2512 | 0.01                                  | 0                                       | 37200.80                        | 15466                             | 4438 - 42373                                  |
| EGR         | EGR3        | 2293 | 0.17                                  | 0                                       | 11634.92                        | 532                               | 135 - 6044                                    |
| MAFG        | NFE2L1:MAFG | 2272 | 0.03                                  | 0                                       | 34641.56                        | 16917                             | 5284 - 42097                                  |
| KLF10       | SP1         | 2233 | 0.00                                  | 0                                       | 9778.94                         | 297                               | 73 - 3077                                     |
| EGR         | EGR2        | 2160 | 0.16                                  | 0                                       | 10502.76                        | 490                               | 129 - 5227                                    |
| KLF3        | SP3         | 2036 | 0.00                                  | 0                                       | 6974.78                         | 246                               | 63 - 1447                                     |
| KLF1        | SP3         | 1771 | 0.00                                  | 0                                       | 7748.42                         | 264                               | 66 - 1829                                     |
| KLF10       | SP3         | 1734 | 0.00                                  | 0                                       | 7275.48                         | 222                               | 58 - 1320                                     |
| KLF7        | SP4         | 1639 | 0.00                                  | 0                                       | 12521.62                        | 309                               | 58 - 4894                                     |
| KLF1        | SP1         | 1574 | 0.05                                  | 0                                       | 6780.46                         | 245                               | 61 - 1438                                     |
| AP1         | JUNB        | 1572 | 0.05                                  | 0                                       | 34158.07                        | 15451                             | 4746 - 40315                                  |
| EGR1        | WT1         | 1543 | 0.31                                  | 0                                       | 12742.28                        | 444                               | 111 - 5553                                    |
| EGR1        | SP1:SP3     | 1393 | 0.08                                  | 0                                       | 7789.54                         | 307                               | 91 - 1886                                     |
| FOS:JUN     | JUNB        | 1386 | 0.14                                  | 0                                       | 33012.80                        | 14245                             | 3900 - 37988                                  |
| SP1         | SP3         | 1372 | 0.00                                  | 0                                       | 8845.31                         | 293                               | 77 - 1816                                     |
| EHF         | ELF1        | 1366 | 0.02                                  | 0                                       | 41217.39                        | 13357                             | 2842 - 43178                                  |
| <b>CTCF</b> | <b>RXRA</b> | 1362 | 0.00                                  | 0                                       | 29981.33                        | 10937                             | 2100 - 31407                                  |
| AP1         | FOS         | 1327 | 0.03                                  | 0                                       | 33225.52                        | 13455                             | 3503 - 37399                                  |
| ATF1        | ATF3        | 1215 | 0.00                                  | 0                                       | 23125.06                        | 3798                              | 342 - 21091                                   |
| ELK1        | ZNF200      | 1156 | 0.05                                  | 0                                       | 22200.49                        | 2883                              | 181 - 17610                                   |
| SP1         | SP4         | 1137 | 0.00                                  | 0                                       | 7371.85                         | 215                               | 63 - 1232                                     |
| EHF         | ELF3        | 1134 | 0.00                                  | 0                                       | 36296.46                        | 10912                             | 596 - 37318                                   |
| MEIS2       | TGIF1       | 1018 | 0.00                                  | 0                                       | 47677.15                        | 17654                             | 3273 - 49233                                  |
| KLF3        | SP1         | 1017 | 0.06                                  | 0                                       | 6514.33                         | 226                               | 60 - 994                                      |
| SP1         | ZNF200      | 913  | 0.06                                  | 0                                       | 10962.81                        | 425                               | 85 - 6046                                     |
| AP1         | FOS:JUN     | 860  | 0.09                                  | 0                                       | 50412.92                        | 24217                             | 7302 - 60018                                  |

848

849

850 FR orientation of CTCF

| Motif 1 | Motif 2 | No.  | Mean of distances bet. DNA sites (nt) | Median of distances bet. DNA sites (nt) | Mean of distances from TSS (nt) | Median of distances from TSS (nt) | Interquartile range of distance from TSS (nt) |
|---------|---------|------|---------------------------------------|-----------------------------------------|---------------------------------|-----------------------------------|-----------------------------------------------|
| CTCF    | SMC3    | 2876 | 0.01                                  | 0                                       | 34606.92                        | 13716                             | 3073 - 39471                                  |
| CTCF    | RAD21   | 2352 | 0.00                                  | 0                                       | 33492.68                        | 12913                             | 2824 - 37672                                  |
| CTCF    | CTCF    | 1151 | 0.00                                  | 0                                       | 30252.04                        | 11606                             | 2229 - 34539                                  |
| CTCF    | ZBTB7A  | 470  | 0.27                                  | 0                                       | 23227.96                        | 7065                              | 745 - 23496                                   |
| CTCF    | E2F     | 123  | 0.81                                  | 0                                       | 7913.36                         | 222                               | 61 - 1997                                     |
| CTCF    | WT1     | 120  | 0.00                                  | 0                                       | 3543.72                         | 114                               | 44 - 375                                      |
| CTCF    | MYC     | 110  | 2.30                                  | 0                                       | 31289.45                        | 11948                             | 2887 - 33972                                  |

851

852

853 RF orientation of CTCF

| Motif 1 | Motif 2 | No.  | Mean of distances bet. DNA sites (nt) | Median of distances bet. DNA sites (nt) | Mean of distances from TSS (nt) | Median of distances from TSS (nt) | Interquartile range of distance from TSS (nt) |
|---------|---------|------|---------------------------------------|-----------------------------------------|---------------------------------|-----------------------------------|-----------------------------------------------|
| CTCF    | RXRA    | 1362 | 0.00                                  | 0                                       | 29981.33                        | 10937                             | 2100 - 31407                                  |
| CTCF    | CTCF    | 429  | 0.00                                  | 0                                       | 25171.22                        | 9834                              | 1859 - 24741                                  |
| CTCF    | RAD21   | 337  | 0.00                                  | 0                                       | 38829.91                        | 17973                             | 6117 - 45749                                  |
| CTCF    | ZIC1    | 126  | 1.40                                  | 0                                       | 35480.65                        | 10286                             | 2316 - 29380                                  |
| CTCF    | ZIC3    | 108  | 0.00                                  | 0                                       | 30219.32                        | 10904                             | 4463 - 31037                                  |

854

855



## 856 **References**

857

858 Ackerman SL, Minden AG, Williams GT, Bobonis C, Yeung CY. 1991. Functional  
859 significance of an overlapping consensus binding motif for Sp1 and Zif268 in  
860 the murine adenosine deaminase gene promoter. *Proc Natl Acad Sci U S A* **88**:  
861 7523-7527.

862 Ansari AZ, Peterson-Kaufman KJ. 2011. A partner evokes latent differences between  
863 Hox proteins. *Cell* **147**: 1220-1221.

864 Bailey SD, Zhang X, Desai K, Aid M, Corradin O, Cowper-Sal Lari R, Akhtar-Zaidi B,  
865 Scacheri PC, Haibe-Kains B, Lupien M. 2015. ZNF143 provides sequence  
866 specificity to secure chromatin interactions at gene promoters. *Nat Commun* **2**:  
867 6186.

868 Barutcu AR, Lajoie BR, Fritz AJ, McCord RP, Nickerson JA, van Wijnen AJ, Lian JB,  
869 Stein JL, Dekker J, Stein GS et al. 2016. SMARCA4 regulates gene expression  
870 and higher-order chromatin structure in proliferating mammary epithelial cells.  
871 *Genome research* **26**: 1188-1201.

872 Chatterjee R, Zhao J, He X, Shlyakhtenko A, Mann I, Waterfall JJ, Meltzer P,  
873 Sathyanarayana BK, FitzGerald PC, Vinson C. 2012. Overlapping ETS and CRE  
874 Motifs ((G/C)CGGAAGTGACGTCA) preferentially bound by GABPalpha and  
875 CREB proteins. *G3 (Bethesda)* **2**: 1243-1256.

876 Chen M, Manley JL. 2009. Mechanisms of alternative splicing regulation: insights from  
877 molecular and genomics approaches. *Nat Rev Mol Cell Biol* **10**: 741-754.

878 Das D, Clark TA, Schweitzer A, Yamamoto M, Marr H, Arribere J, Minovitsky S,  
879 Poliakov A, Dubchak I, Blume JE et al. 2007. A correlation with exon  
880 expression approach to identify cis-regulatory elements for tissue-specific  
881 alternative splicing. *Nucleic acids research* **35**: 4845-4857.

882 de Wit E, Vos ES, Holwerda SJ, Valdes-Quezada C, Verstegen MJ, Teunissen H,  
883 Splinter E, Wijchers PJ, Krijger PH, de Laat W. 2015. CTCF Binding Polarity  
884 Determines Chromatin Looping. *Molecular cell* **60**: 676-684.

885 Guo Y, Xu Q, Canzio D, Shou J, Li J, Gorkin DU, Jung I, Wu H, Zhai Y, Tang Y et al.  
886 2015. CRISPR Inversion of CTCF Sites Alters Genome Topology and  
887 Enhancer/Promoter Function. *Cell* **162**: 900-910.

- 888 He X, Syed KS, Tillo D, Mann I, Weirauch MT, Vinson C. 2015. GABPalpha Binding  
889 to Overlapping ETS and CRE DNA Motifs Is Enhanced by CREB1: Custom  
890 DNA Microarrays. *G3 (Bethesda)* **5**: 1909-1918.
- 891 Hsu SC, Gilgenast TG, Bartman CR, Edwards CR, Stonestrom AJ, Huang P, Emerson  
892 DJ, Evans P, Werner MT, Keller CA et al. 2017. The BET Protein BRD2  
893 Cooperates with CTCF to Enforce Transcriptional and Architectural Boundaries.  
894 *Molecular cell* **66**: 102-116 e107.
- 895 Ji X, Dadon DB, Abraham BJ, Lee TI, Jaenisch R, Bradner JE, Young RA. 2015.  
896 Chromatin proteomic profiling reveals novel proteins associated with  
897 histone-marked genomic regions. *Proc Natl Acad Sci U S A* **112**: 3841-3846.
- 898 Jolma A, Yan J, Whittington T, Toivonen J, Nitta KR, Rastas P, Morgunova E, Enge M,  
899 Taipale M, Wei G et al. 2013. DNA-binding specificities of human transcription  
900 factors. *Cell* **152**: 327-339.
- 901 Jolma A, Yin Y, Nitta KR, Dave K, Popov A, Taipale M, Enge M, Kivioja T, Morgunova  
902 E, Taipale J. 2015. DNA-dependent formation of transcription factor pairs alters  
903 their binding specificity. *Nature* **527**: 384-388.
- 904 Jung I, Schmitt A, Diao Y, Lee AJ, Liu T, Yang D, Tan C, Eom J, Chan M, Chee S et al.  
905 2019. A compendium of promoter-centered long-range chromatin interactions in  
906 the human genome. *Nature genetics* **51**: 1442-1449.
- 907 Karolchik D, Barber GP, Casper J, Clawson H, Cline MS, Diekhans M, Dreszer TR,  
908 Fujita PA, Guruvadoo L, Haeussler M et al. 2014. The UCSC Genome Browser  
909 database: 2014 update. *Nucleic acids research* **42**: D764-770.
- 910 Katainen R, Dave K, Pitkanen E, Palin K, Kivioja T, Valimaki N, Gylfe AE, Ristolainen  
911 H, Hanninen UA, Cajuso T et al. 2015. CTCF/cohesin-binding sites are  
912 frequently mutated in cancer. *Nature genetics* **47**: 818-821.
- 913 Kel AE, Gossling E, Reuter I, Cheremushkin E, Kel-Margoulis OV, Wingender E. 2003.  
914 MATCH: A tool for searching transcription factor binding sites in DNA  
915 sequences. *Nucleic acids research* **31**: 3576-3579.
- 916 Kheradpour P, Kellis M. 2014. Systematic discovery and characterization of regulatory  
917 motifs in ENCODE TF binding experiments. *Nucleic acids research* **42**:  
918 2976-2987.
- 919 Kin K, Chen X, Gonzalez-Garay M, Fakhouri WD. 2016. The effect of non-coding  
920 DNA variations on P53 and cMYC competitive inhibition at cis-overlapping

- 921 motifs. *Hum Mol Genet* **25**: 1517-1527.
- 922 Kulakovskiy IV, Vorontsov IE, Yevshin IS, Sharipov RN, Fedorova AD, Rumynskiy EI,  
923 Medvedeva YA, Magana-Mora A, Bajic VB, Papatsenko DA et al. 2018.  
924 HOCOMOCO: towards a complete collection of transcription factor binding  
925 models for human and mouse via large-scale ChIP-Seq analysis. *Nucleic acids*  
926 *research* **46**: D252-D259.
- 927 Li H, Durbin R. 2009. Fast and accurate short read alignment with Burrows-Wheeler  
928 transform. *Bioinformatics (Oxford, England)* **25**: 1754-1760.
- 929 Lieberman-Aiden E, van Berkum NL, Williams L, Imakaev M, Ragoczy T, Telling A,  
930 Amit I, Lajoie BR, Sabo PJ, Dorschner MO et al. 2009. Comprehensive  
931 mapping of long-range interactions reveals folding principles of the human  
932 genome. *Science (New York, NY)* **326**: 289-293.
- 933 McLean CY, Bristor D, Hiller M, Clarke SL, Schaar BT, Lowe CB, Wenger AM,  
934 Bejerano G. 2010. GREAT improves functional interpretation of cis-regulatory  
935 regions. *Nature biotechnology* **28**: 495-501.
- 936 Merabet S, Mann RS. 2016. To Be Specific or Not: The Critical Relationship Between  
937 Hox And TALE Proteins. *Trends Genet* **32**: 334-347.
- 938 Mumbach MR, Satpathy AT, Boyle EA, Dai C, Gowen BG, Cho SW, Nguyen ML,  
939 Rubin AJ, Granja JM, Kazane KR et al. 2017. Enhancer connectome in primary  
940 human cells identifies target genes of disease-associated DNA elements. *Nature*  
941 *genetics* **49**: 1602-1612.
- 942 Neph S, Kuehn MS, Reynolds AP, Haugen E, Thurman RE, Johnson AK, Rynes E,  
943 Maurano MT, Vierstra J, Thomas S et al. 2012. BEDOPS: high-performance  
944 genomic feature operations. *Bioinformatics (Oxford, England)* **28**: 1919-1920.
- 945 Newburger DE, Bulyk ML. 2009. UniPROBE: an online database of protein binding  
946 microarray data on protein-DNA interactions. *Nucleic acids research* **37**:  
947 D77-82.
- 948 Osato N. 2018. Characteristics of functional enrichment and gene expression level of  
949 human putative transcriptional target genes. *BMC Genomics* **19**: 957.
- 950 Phanstiel DH, Van Bortle K, Spacek D, Hess GT, Shamim MS, Machol I, Love MI,  
951 Aiden EL, Bassik MC, Snyder MP. 2017. Static and Dynamic DNA Loops form  
952 AP-1-Bound Activation Hubs during Macrophage Development. *Molecular cell*  
953 **67**: 1037-1048.e1036.

- 954 Portales-Casamar E, Thongjuea S, Kwon AT, Arenillas D, Zhao X, Valen E, Yusuf D,  
955 Lenhard B, Wasserman WW, Sandelin A. 2010. JASPAR 2010: the greatly  
956 expanded open-access database of transcription factor binding profiles. *Nucleic  
957 acids research* **38**: D105-110.
- 958 Purmann A, Toedling J, Schueler M, Carninci P, Lehrach H, Hayashizaki Y, Huber W,  
959 Sperling S. 2007. Genomic organization of transcriptomes in mammals:  
960 Coregulation and cofunctionality. *Genomics* **89**: 580-587.
- 961 Rao SS, Huntley MH, Durand NC, Stamenova EK, Bochkov ID, Robinson JT, Sanborn  
962 AL, Machol I, Omer AD, Lander ES et al. 2014. A 3D map of the human  
963 genome at kilobase resolution reveals principles of chromatin looping. *Cell* **159**:  
964 1665-1680.
- 965 Schreiber J, Libbrecht M, Bilmes J, Noble W. 2017. Nucleotide sequence and DNaseI  
966 sensitivity are predictive of 3D chromatin architecture. *bioRxiv*.
- 967 Sherwood RI, Hashimoto T, O'Donnell CW, Lewis S, Barkal AA, van Hoff JP, Karun V,  
968 Jaakkola T, Gifford DK. 2014. Discovery of directional and nondirectional  
969 pioneer transcription factors by modeling DNase profile magnitude and shape.  
970 *Nature biotechnology* **32**: 171-178.
- 971 Shlyueva D, Stampfel G, Stark A. 2014. Transcriptional enhancers: from properties to  
972 genome-wide predictions. *Nature reviews Genetics* **15**: 272-286.
- 973 Shrivastava A, Calame K. 1994. An analysis of genes regulated by the multi-functional  
974 transcriptional regulator Yin Yang-1. *Nucleic acids research* **22**: 5151-5155.
- 975 Slattery M, Riley T, Liu P, Abe N, Gomez-Alcala P, Dror I, Zhou T, Rohs R, Honig B,  
976 Bussemaker HJ et al. 2011. Cofactor binding evokes latent differences in DNA  
977 binding specificity between Hox proteins. *Cell* **147**: 1270-1282.
- 978 Tabuchi TM, Deplancke B, Osato N, Zhu LJ, Barrasa MI, Harrison MM, Horvitz HR,  
979 Walhout AJ, Hagstrom KA. 2011. Chromosome-biased binding and gene  
980 regulation by the *Caenorhabditis elegans* DRM complex. *PLoS Genet* **7**:  
981 e1002074.
- 982 van Helden J. 2003. Regulatory sequence analysis tools. *Nucleic acids research* **31**:  
983 3593-3596.
- 984 Wang ET, Sandberg R, Luo S, Khrebtkova I, Zhang L, Mayr C, Kingsmore SF,  
985 Schroth GP, Burge CB. 2008. Alternative isoform regulation in human tissue  
986 transcriptomes. *Nature* **456**: 470-476.

- 987 Wang J, Zhuang J, Iyer S, Lin X, Whitfield TW, Greven MC, Pierce BG, Dong X,  
988 Kundaje A, Cheng Y et al. 2012a. Sequence features and chromatin structure  
989 around the genomic regions bound by 119 human transcription factors. *Genome*  
990 *research* **22**: 1798-1812.
- 991 Wang L, Wang S, Li W. 2012b. RSeQC: quality control of RNA-seq experiments.  
992 *Bioinformatics (Oxford, England)* **28**: 2184-2185.
- 993 Wei Z, Gao F, Kim S, Yang H, Lyu J, An W, Wang K, Lu W. 2013. Klf4 organizes  
994 long-range chromosomal interactions with the oct4 locus in reprogramming and  
995 pluripotency. *Cell Stem Cell* **13**: 36-47.
- 996 Weintraub AS, Li CH, Zamudio AV, Sigova AA, Hannett NM, Day DS, Abraham BJ,  
997 Cohen MA, Nabet B, Buckley DL et al. 2017. YY1 Is a Structural Regulator of  
998 Enhancer-Promoter Loops. *Cell* **171**: 1573-1588 e1528.
- 999 Wingender E, Dietze P, Karas H, Knuppel R. 1996. TRANSFAC: a database on  
1000 transcription factors and their DNA binding sites. *Nucleic acids research* **24**:  
1001 238-241.
- 1002 Xi H, Yu Y, Fu Y, Foley J, Halees A, Weng Z. 2007. Analysis of overrepresented motifs  
1003 in human core promoters reveals dual regulatory roles of YY1. *Genome research*  
1004 **17**: 798-806.
- 1005 Xie X, Mikkelsen TS, Gnirke A, Lindblad-Toh K, Kellis M, Lander ES. 2007.  
1006 Systematic discovery of regulatory motifs in conserved regions of the human  
1007 genome, including thousands of CTCF insulator sites. *Proc Natl Acad Sci U S A*  
1008 **104**: 7145-7150.
- 1009 Xie Z, Hu S, Blackshaw S, Zhu H, Qian J. 2010. hPDI: a database of experimental  
1010 human protein-DNA interactions. *Bioinformatics (Oxford, England)* **26**:  
1011 287-289.
- 1012 Yardimci GG, Ozadam H, Sauria MEG, Ursu O, Yan KK, Yang T, Chakraborty A, Kaul  
1013 A, Lajoie BR, Song F et al. 2019. Measuring the reproducibility and quality of  
1014 Hi-C data. *Genome Biol* **20**: 57.
- 1015 Yoon SO, Chikaraishi DM. 1992. Tissue-specific transcription of the rat tyrosine  
1016 hydroxylase gene requires synergy between an AP-1 motif and an overlapping E  
1017 box-containing dyad. *Neuron* **9**: 55-67.
- 1018 Zhang H, Li F, Jia Y, Xu B, Zhang Y, Li X, Zhang Z. 2017. Characteristic arrangement  
1019 of nucleosomes is predictive of chromatin interactions at kilobase resolution.

- 1020            *Nucleic acids research* **45**: 12739-12751.
- 1021    Zhang Y, Liu T, Meyer CA, Eeckhoute J, Johnson DS, Bernstein BE, Nusbaum C,  
1022            Myers RM, Brown M, Li W et al. 2008. Model-based analysis of ChIP-Seq  
1023            (MACS). *Genome Biol* **9**: R137.
- 1024    Zhao Y, Stormo GD. 2011. Quantitative analysis demonstrates most transcription factors  
1025            require only simple models of specificity. *Nature biotechnology* **29**: 480-483.
- 1026
